# Supplementary material
Source: publisher figshare collection journal article supplement (https://diabetesjournals.figshare.com/articles/dataset/_/21793130)
Supplement: Supplementary file 1 [file 38677385]

## Online Supplement

- Supplemental Table S1. ICD9 and ICD10 diagnosis codes used to define diabetic macular edema or vision-threatening diabetic retinopathy (DME/VTDR)
- Supplemental Table S2. ICD9 and ICD10 diagnosis codes used to define any diabetic macular edema (any DME)
- Supplemental Table S3. ICD9 and ICD10 diagnosis codes used to define non-vision-threatening diabetes-related eye disease
- Supplemental Table S4: List of procedure codes (Current Procedural Terminology [CPT] and Healthcare Common Procedure Coding [HCPC] System) used to define four treatment types for diabetes-related eye disease  
Four treatment types:
  - Anti-vascular endothelial growth factor (VEGF) injections
  - Laser photocoagulation
  - Vitrectomy
  - Retinal detachment repair
- Supplemental Tables S5–7 Define the disease categories that serve as the denominators for the four treatment types.
  - Supplemental Table S5. ICD9 and ICD10 diagnosis codes used to define vision-threatening diabetic retinopathy without diabetic macular edema (VTDR without DME)
  - Supplemental Table S6. ICD9 and ICD10 diagnosis codes used to define vision-threatening diabetic retinopathy with diabetic macular edema (VTDR with DME)
  - Supplemental Table S7. ICD9 and ICD10 diagnosis codes used to define any diabetic macular edema (any DME)
- Supplemental Table S8. Statistical Comparison of the Annual Prevalence of Diabetic Macular Edema or Vision-Threatening Diabetic Retinopathy (DME/VTDR) to Determine Differences by Sex, Age Groups, and Six Age and Sex Groups
- Supplemental Table S9. Statistical Comparison of the Annual Prevalence of Any Diabetic Macular Edema (any DME) to Determine Differences by Sex, Age Groups, and Six Age and Sex Groups
- Supplemental Table S10. Statistical Comparison of the Annual Prevalence of Non-Vision-Threatening Diabetes-Related Eye Disease to Determine Differences by Sex, Age Groups, and Six Age and Sex Groups
- Supplemental Table S11. Annual prevalence of having  $\geq 1$  claim for diabetic macular edema or vision-threatening diabetic retinopathy (DME/VTDR) among adults 18–64 years of age with diabetes, IBM® MarketScan® Database (2009–2018)
- Supplemental Table S12. Annual prevalence of having  $\geq 1$  claim for any diabetic macular edema (any DME) among adults 18–64 years of age with diabetes, IBM® MarketScan® Database (2009–2018)
- Supplemental Table S13. Annual prevalence of having  $\geq 1$  claim for non-vision-threatening diabetes-related eye disease among adults 18–64 years of age with diabetes, IBM® MarketScan® Database (2009–2018)
- Supplemental Table S14. Annual prevalence of having  $\geq 1$  claim for treatment among adults 18–64 years with diabetes, IBM® MarketScan® Database (2009–2018)
- Supplemental Table S15. Characteristics of MarketScan population (adults 18-64 years), by year

**Supplemental Table S1. ICD9 and ICD10 diagnosis codes used to define diabetic macular edema or vision-threatening diabetic retinopathy (DME/VTDR)<sup>a</sup>**

| <b>Code</b> | <b>Description</b>                                                                                                                                               |
|-------------|------------------------------------------------------------------------------------------------------------------------------------------------------------------|
| 362.06      | Severe non-proliferative diabetic retinopathy                                                                                                                    |
| 362.02      | Proliferative diabetic retinopathy                                                                                                                               |
| 362.07      | Diabetic macular edema                                                                                                                                           |
| E08.341     | Severe non-proliferative diabetic retinopathy with macular edema (diabetes mellitus due to underlying condition)                                                 |
| E09.341     | Severe non-proliferative diabetic retinopathy with macular edema (drug or chemical induced diabetes mellitus)                                                    |
| E10.341     | Severe non-proliferative diabetic retinopathy with macular edema (type 1 diabetes mellitus)                                                                      |
| E11.341     | Severe non-proliferative diabetic retinopathy with macular edema (type 2 diabetes mellitus)                                                                      |
| E13.341     | Severe non-proliferative diabetic retinopathy with macular edema (other specified diabetes mellitus)                                                             |
| E08.349     | Severe non-proliferative diabetic retinopathy without macular edema (diabetes mellitus due to underlying condition)                                              |
| E09.349     | Severe non-proliferative diabetic retinopathy without macular edema (drug/chemical-induced diabetes mellitus)                                                    |
| E10.349     | Severe non-proliferative diabetic retinopathy without macular edema (type 1 diabetes mellitus)                                                                   |
| E11.349     | Severe non-proliferative diabetic retinopathy without macular edema (type 2 diabetes mellitus)                                                                   |
| E13.349     | Severe non-proliferative diabetic retinopathy without macular edema (other specified diabetes mellitus)                                                          |
| E08.351     | Proliferative diabetic retinopathy with macular edema (diabetes mellitus due to underlying condition)                                                            |
| E09.351     | Proliferative diabetic retinopathy with macular edema (drug or chemical induced diabetes mellitus)                                                               |
| E10.351     | Proliferative diabetic retinopathy with macular edema (type 1 diabetes mellitus)                                                                                 |
| E11.351     | Proliferative diabetic retinopathy with macular edema (type 2 diabetes mellitus)                                                                                 |
| E13.351     | Proliferative diabetic retinopathy with macular edema (other specified diabetes mellitus)                                                                        |
| E08.352     | Proliferative diabetic retinopathy with traction retinal detachment involving the macula (diabetes mellitus due to underlying condition)                         |
| E09.352     | Proliferative diabetic retinopathy with traction retinal detachment involving the macula (drug/chemical induced diabetes mellitus)                               |
| E10.352     | Proliferative diabetic retinopathy with traction retinal detachment involving the macula (type 1 diabetes mellitus)                                              |
| E11.352     | Proliferative diabetic retinopathy with traction retinal detachment involving the macula (type 2 diabetes mellitus)                                              |
| E13.352     | Proliferative diabetic retinopathy with traction retinal detachment involving the macula (other specified diabetes mellitus)                                     |
| E08.353     | Proliferative diabetic retinopathy with traction retinal detachment not involving macula (diabetes mellitus due to underlying condition)                         |
| E09.353     | Proliferative diabetic retinopathy with traction retinal detachment not involving macula (drug/chemical induced diabetes mellitus)                               |
| E10.353     | Proliferative diabetic retinopathy with traction retinal detachment not involving the macula (type 1 diabetes mellitus)                                          |
| E11.353     | Proliferative diabetic retinopathy with traction retinal detachment not involving the macula (type 2 diabetes mellitus)                                          |
| E13.353     | Proliferative diabetic retinopathy with traction retinal detachment not involving the macula (other specified diabetes mellitus)                                 |
| E08.354     | Proliferative diabetic retinopathy with combined traction retinal detachment & rhegmatogenous retinal detachment (diabetes mellitus due to underlying condition) |
| E09.354     | Proliferative diabetic retinopathy with combined traction retinal detachment & rhegmatogenous retinal detachment (drug/chemical induced diabetes mellitus)       |
| E10.354     | Proliferative diabetic retinopathy with combined traction retinal detachment & rhegmatogenous retinal detachment (type 1 diabetes mellitus)                      |
| E11.354     | Proliferative diabetic retinopathy with combined traction retinal detachment & rhegmatogenous retinal detachment (type 2 diabetes mellitus)                      |
| E13.354     | Proliferative diabetic retinopathy with combined traction retinal detachment & rhegmatogenous retinal detachment (other specified diabetes mellitus)             |

<sup>a</sup> Diabetic macular edema or vision-threatening diabetic retinopathy is characterized as: diabetic macular edema, severe non-proliferative diabetic retinopathy (with or without diabetic macular edema), or proliferative diabetic retinopathy (with or without diabetic macular edema).

**Supplemental Table S1 (continued). ICD9 and ICD10 diagnosis codes used to define diabetic macular edema or vision-threatening diabetic retinopathy (DME/VTDR)<sup>a</sup>**

| Code    | Description                                                                                                        |
|---------|--------------------------------------------------------------------------------------------------------------------|
| E08.355 | Stable proliferative diabetic retinopathy (diabetes mellitus due to underlying condition)                          |
| E09.355 | Stable proliferative diabetic retinopathy (drug or chemical induced diabetes mellitus)                             |
| E10.355 | Stable proliferative diabetic retinopathy (type 1 diabetes mellitus)                                               |
| E11.355 | Stable proliferative diabetic retinopathy (type 2 diabetes mellitus)                                               |
| E13.355 | Stable proliferative diabetic retinopathy (other specified diabetes mellitus)                                      |
| E08.359 | Proliferative diabetic retinopathy without macular edema (diabetes mellitus due to underlying condition)           |
| E09.359 | Proliferative diabetic retinopathy without macular edema (drug/chemical-induced diabetes mellitus)                 |
| E10.359 | Proliferative diabetic retinopathy without macular edema (type 1 diabetes mellitus)                                |
| E11.359 | Proliferative diabetic retinopathy without macular edema (type 2 diabetes mellitus)                                |
| E13.359 | Proliferative diabetic retinopathy without macular edema (other specified diabetes mellitus)                       |
| E08.321 | Mild non-proliferative diabetic retinopathy with macular edema (diabetes mellitus due to underlying condition)     |
| E09.321 | Mild non-proliferative diabetic retinopathy with macular edema (drug or chemical induced diabetes mellitus)        |
| E10.321 | Mild non-proliferative diabetic retinopathy with macular edema (type 1 diabetes mellitus)                          |
| E11.321 | Mild non-proliferative diabetic retinopathy with macular edema (type 2 diabetes mellitus)                          |
| E13.321 | Mild non-proliferative diabetic retinopathy with macular edema (other specified diabetes mellitus)                 |
| E08.331 | Moderate non-proliferative diabetic retinopathy with macular edema (diabetes mellitus due to underlying condition) |
| E09.331 | Moderate non-proliferative diabetic retinopathy with macular edema (drug or chemical induced diabetes mellitus)    |
| E10.331 | Moderate non-proliferative diabetic retinopathy with macular edema (type 1 diabetes mellitus)                      |
| E11.331 | Moderate non-proliferative diabetic retinopathy with macular edema (type 2 diabetes mellitus)                      |
| E13.331 | Moderate non-proliferative diabetic retinopathy with macular edema (other specified diabetes mellitus)             |
| E08.311 | Unspecified diabetic retinopathy with macular edema (diabetes mellitus due to underlying condition)                |
| E09.311 | Unspecified diabetic retinopathy with macular edema (drug or chemical induced diabetes mellitus)                   |
| E10.311 | Unspecified diabetic retinopathy with macular edema (type 1 diabetes mellitus)                                     |
| E11.311 | Unspecified diabetic retinopathy with macular edema (type 2 diabetes mellitus)                                     |
| E13.311 | Unspecified diabetic retinopathy with macular edema (other specified diabetes mellitus)                            |
| E08.37X | Diabetic macular edema, resolved following treatment (diabetes mellitus due to underlying condition)               |
| E09.37X | Diabetic macular edema, resolved following treatment (drug or chemical induced diabetes mellitus)                  |
| E10.37X | Diabetic macular edema, resolved following treatment (type 1 diabetes mellitus)                                    |
| E11.37X | Diabetic macular edema, resolved following treatment (type 2 diabetes mellitus)                                    |
| E13.37X | Diabetic macular edema, resolved following treatment (other specified diabetes mellitus)                           |

<sup>a</sup> Diabetic macular edema or vision-threatening diabetic retinopathy is characterized as: diabetic macular edema, severe non-proliferative diabetic retinopathy (with or without diabetic macular edema), or proliferative diabetic retinopathy (with or without diabetic macular edema).

**Supplemental Table S2. ICD9 and ICD10 diagnosis codes used to define any diabetic macular edema (any DME)<sup>a</sup>**

| Code    | Description                                                                                                        |
|---------|--------------------------------------------------------------------------------------------------------------------|
| 362.07  | Diabetic macular edema                                                                                             |
| E08.311 | Unspecified diabetic retinopathy with macular edema (diabetes mellitus due to underlying condition)                |
| E09.311 | Unspecified diabetic retinopathy with macular edema (drug or chemical induced diabetes mellitus)                   |
| E10.311 | Unspecified diabetic retinopathy with macular edema (type 1 diabetes mellitus)                                     |
| E11.311 | Unspecified diabetic retinopathy with macular edema (type 2 diabetes mellitus)                                     |
| E13.311 | Unspecified diabetic retinopathy with macular edema (other specified diabetes mellitus)                            |
| E08.321 | Mild non-proliferative diabetic retinopathy with macular edema (diabetes mellitus due to underlying condition)     |
| E09.321 | Mild non-proliferative diabetic retinopathy with macular edema (drug or chemical induced diabetes mellitus)        |
| E10.321 | Mild non-proliferative diabetic retinopathy with macular edema (type 1 diabetes mellitus)                          |
| E11.321 | Mild non-proliferative diabetic retinopathy with macular edema (type 2 diabetes mellitus)                          |
| E13.321 | Mild non-proliferative diabetic retinopathy with macular edema (other specified diabetes mellitus)                 |
| E08.331 | Moderate non-proliferative diabetic retinopathy with macular edema (diabetes mellitus due to underlying condition) |
| E09.331 | Moderate non-proliferative diabetic retinopathy with macular edema (drug or chemical induced diabetes mellitus)    |
| E10.331 | Moderate non-proliferative diabetic retinopathy with macular edema (type 1 diabetes mellitus)                      |
| E11.331 | Moderate non-proliferative diabetic retinopathy with macular edema (type 2 diabetes mellitus)                      |
| E13.331 | Moderate non-proliferative diabetic retinopathy with macular edema (other specified diabetes mellitus)             |
| E08.341 | Severe non-proliferative diabetic retinopathy with macular edema (diabetes mellitus due to underlying condition)   |
| E09.341 | Severe non-proliferative diabetic retinopathy with macular edema (drug or chemical induced diabetes mellitus)      |
| E10.341 | Severe non-proliferative diabetic retinopathy with macular edema (type 1 diabetes mellitus)                        |
| E11.341 | Severe non-proliferative diabetic retinopathy with macular edema (type 2 diabetes mellitus)                        |
| E13.341 | Severe non-proliferative diabetic retinopathy with macular edema (other specified diabetes mellitus)               |
| E08.351 | Proliferative diabetic retinopathy with macular edema (diabetes mellitus due to underlying condition)              |
| E09.351 | Proliferative diabetic retinopathy with macular edema (drug or chemical induced diabetes mellitus)                 |
| E10.351 | Proliferative diabetic retinopathy with macular edema (type 1 diabetes mellitus)                                   |
| E11.351 | Proliferative diabetic retinopathy with macular edema (type 2 diabetes mellitus)                                   |
| E13.351 | Proliferative diabetic retinopathy with macular edema (other specified diabetes mellitus)                          |
| E08.37  | Diabetic macular edema, resolved following treatment (diabetes mellitus due to underlying condition)               |
| E09.37  | Diabetic macular edema, resolved following treatment (drug or chemical induced diabetes mellitus)                  |
| E10.37  | Diabetic macular edema, resolved following treatment (type 1 diabetes mellitus)                                    |
| E11.37  | Diabetic macular edema, resolved following treatment (type 2 diabetes mellitus)                                    |
| E13.37  | Diabetic macular edema, resolved following treatment (other specified diabetes mellitus)                           |

<sup>a</sup> Any diabetic macular edema is characterized as: any ICD9/ICD10 code that contains a diagnosis of diabetic macular edema (by itself or with any stage of diabetic retinopathy).

**Supplemental Table S3. ICD9 and ICD10 diagnosis codes used to define non-vision-threatening diabetes-related eye disease<sup>a</sup>**

| <b>Code</b> | <b>Description</b>                                                                                                    |
|-------------|-----------------------------------------------------------------------------------------------------------------------|
| 362.01      | Background diabetic retinopathy                                                                                       |
| 362.03      | Non-proliferative diabetic retinopathy (not otherwise specified)                                                      |
| 362.04      | Mild non-proliferative diabetic retinopathy                                                                           |
| 362.05      | Moderate non-proliferative diabetic retinopathy                                                                       |
| 250.50      | Diabetes with ophthalmic manifestations, type II/unspecified type, not stated as uncontrolled                         |
| 250.52      | Diabetes with ophthalmic manifestations, type II/unspecified type, uncontrolled                                       |
| 250.51      | Diabetes with ophthalmic manifestations, type I [juvenile type], not stated as uncontrolled                           |
| 250.53      | Diabetes with ophthalmic manifestations, type I [juvenile type], uncontrolled                                         |
| 249.50      | Secondary diabetes mellitus with ophthalmic manifestations, not stated as uncontrolled, or unspecified                |
| 249.51      | Secondary diabetes mellitus with ophthalmic manifestations, uncontrolled                                              |
| E08.319     | Unspecified diabetic retinopathy without macular edema (diabetes mellitus due to underlying condition)                |
| E09.319     | Unspecified diabetic retinopathy without macular edema (drug or chemical induced diabetes mellitus)                   |
| E10.319     | Unspecified diabetic retinopathy without macular edema (type 1 diabetes mellitus)                                     |
| E11.319     | Unspecified diabetic retinopathy without macular edema (type 2 diabetes mellitus)                                     |
| E13.319     | Unspecified diabetic retinopathy without macular edema (other specified diabetes mellitus)                            |
| E08.329     | Mild non-proliferative diabetic retinopathy without macular edema (diabetes mellitus due to underlying condition)     |
| E09.329     | Mild non-proliferative diabetic retinopathy without macular edema (drug or chemical induced diabetes mellitus)        |
| E10.329     | Mild non-proliferative diabetic retinopathy without macular edema (type 1 diabetes mellitus)                          |
| E11.329     | Mild non-proliferative diabetic retinopathy without macular edema (type 2 diabetes mellitus)                          |
| E13.329     | Mild non-proliferative diabetic retinopathy without macular edema (other specified diabetes mellitus)                 |
| E08.339     | Moderate non-proliferative diabetic retinopathy without macular edema (diabetes mellitus due to underlying condition) |
| E09.339     | Moderate non-proliferative diabetic retinopathy without macular edema (drug or chemical induced diabetes mellitus)    |
| E11.339     | Moderate non-proliferative diabetic retinopathy without macular edema (type 2 diabetes mellitus)                      |
| E10.339     | Moderate non-proliferative diabetic retinopathy without macular edema (type 1 diabetes mellitus)                      |
| E13.339     | Moderate non-proliferative diabetic retinopathy without macular edema (other specified diabetes mellitus)             |
| E08.39      | Other diabetic ophthalmic complication (diabetes mellitus due to underlying condition)                                |
| E09.39      | Other diabetic ophthalmic complication (drug or chemical induced diabetes mellitus)                                   |
| E10.39      | Other diabetic ophthalmic complication (type 1 diabetes mellitus)                                                     |
| E11.39      | Other diabetic ophthalmic complication (type 2 diabetes mellitus)                                                     |
| E13.39      | Other diabetic ophthalmic complication (other specified diabetes mellitus)                                            |

<sup>a</sup> A Non-vision-threatening diabetes-related eye disease was characterized as: background diabetic retinopathy, non-proliferative diabetic retinopathy (not otherwise specified), unspecified diabetic retinopathy without macular edema, mild non-proliferative diabetic retinopathy (without diabetic macular edema), moderate non-proliferative diabetic retinopathy (without diabetic macular edema), diabetes with ophthalmic manifestations, or other diabetic ophthalmic complication.

| <b>Supplemental Table S4: List of CPT and HCPC codes used to define four treatment types for diabetes-related eye disease</b> |                                                                                                                                                                                                                                             |                                                                    |                                         |                                  |
|-------------------------------------------------------------------------------------------------------------------------------|---------------------------------------------------------------------------------------------------------------------------------------------------------------------------------------------------------------------------------------------|--------------------------------------------------------------------|-----------------------------------------|----------------------------------|
| <b>CPT/HCPC Code</b>                                                                                                          | <b>CPT/HCPC Code Description</b>                                                                                                                                                                                                            | <b>Claim-level additional required codes</b>                       | <b>Patient-level required diagnosis</b> | <b>Aggregated treatment type</b> |
| J0178                                                                                                                         | aflibercept                                                                                                                                                                                                                                 | N/A                                                                | Diabetic Eye Diseases                   | Anti-VEGF injections             |
| J2778                                                                                                                         | ranibizumab                                                                                                                                                                                                                                 | N/A                                                                | Diabetic Eye Diseases                   | Anti-VEGF injections             |
| J9035                                                                                                                         | bevacizumab                                                                                                                                                                                                                                 | Claim has primary diagnosis of diabetic eye diseases, or CPT 67028 | Diabetic Eye Diseases                   | Anti-VEGF injections             |
| J3490                                                                                                                         | bevacizumab                                                                                                                                                                                                                                 | Claim has primary diagnosis of diabetic eye diseases, or CPT 67028 | Diabetic Eye Diseases                   | Anti-VEGF injections             |
| J3590                                                                                                                         | bevacizumab                                                                                                                                                                                                                                 | Claim has primary diagnosis of diabetic eye diseases, or CPT 67028 | Diabetic Eye Diseases                   | Anti-VEGF injections             |
| C9257                                                                                                                         | Injection, bevacizumab, 0.25 mg                                                                                                                                                                                                             | Claim has primary diagnosis of diabetic eye diseases, or CPT 67028 | Diabetic Eye Diseases                   | Anti-VEGF injections             |
| Q5107                                                                                                                         | Injection, bevacizumab-awwb, biosimilar, (mvasi), 10 mg                                                                                                                                                                                     | Claim has primary diagnosis of diabetic eye diseases, or CPT 67028 | Diabetic Eye Diseases                   | Anti-VEGF injections             |
| J7999                                                                                                                         | Compounded drugs                                                                                                                                                                                                                            | Claim has primary diagnosis of diabetic eye diseases, or CPT 67028 | Diabetic Eye Diseases                   | Anti-VEGF injections             |
| J3590                                                                                                                         | Unclassified biologics used in medical care                                                                                                                                                                                                 | Claim has primary diagnosis of diabetic eye diseases, or CPT 67028 | Diabetic Eye Diseases                   | Anti-VEGF injections             |
| J3490                                                                                                                         | Unclassified drugs used in medical care                                                                                                                                                                                                     | Claim has primary diagnosis of diabetic eye diseases, or CPT 67028 | Diabetic Eye Diseases                   | Anti-VEGF injections             |
| Q9977                                                                                                                         | Compounded drug, not otherwise classified                                                                                                                                                                                                   | Claim has primary diagnosis of diabetic eye diseases, or CPT 67028 | Diabetic Eye Diseases                   | Anti-VEGF injections             |
| 67210                                                                                                                         | Destruction of localized lesion of retina (e.g., macular edema, tumors), 1 or more sessions; photocoagulation                                                                                                                               | N/A                                                                | Diabetic Eye Diseases                   | Laser photocoagulation           |
| 67220                                                                                                                         | Destruction of localized lesion of choroid (e.g., choroidal neovascularization); photocoagulation 1 or more sessions                                                                                                                        | N/A                                                                | Diabetic Eye Diseases                   | Laser photocoagulation           |
| 67228                                                                                                                         | Treatment of extensive or progressive retinopathy (e.g., diabetic retinopathy), photocoagulation                                                                                                                                            | N/A                                                                | Diabetic Eye Diseases                   | Laser photocoagulation           |
| 67229                                                                                                                         | Treatment of extensive or progressive retinopathy, 1 or more sessions, preterm infant (less than 37 weeks gestation at birth), performed from birth up to 1 year of age (e.g., retinopathy of prematurity), photocoagulation or cryotherapy | N/A                                                                | Diabetic Eye Diseases                   | Laser photocoagulation           |
| 67108                                                                                                                         | Repair of retinal detachment; with vitrectomy, any method                                                                                                                                                                                   | N/A                                                                | Diabetic Eye Diseases                   | Vitrectomy                       |
| 67036                                                                                                                         | Vitrectomy, mechanical, pars plana approach                                                                                                                                                                                                 | N/A                                                                | Diabetic Eye Diseases                   | Vitrectomy                       |
| 67039                                                                                                                         | Vitrectomy, mechanical, pars plana approach; with focal endolaser photocoagulation                                                                                                                                                          | N/A                                                                | Diabetic Eye Diseases                   | Vitrectomy                       |
| 67040                                                                                                                         | Vitreous procedures on the posterior segment of the eye                                                                                                                                                                                     | N/A                                                                | Diabetic Eye Diseases                   | Vitrectomy                       |

Abbreviations: CPT (Current Procedural Terminology), HCPC (Healthcare Common Procedure Coding), VEGF (vascular endothelial growth factor). Diabetic eye disease defined as any of the three groups listed in eTables 1-3: 1. Diabetic macular edema or vision-threatening diabetic retinopathy, 2. Diabetic macular edema of any type, or 3. Non-vision-threatening diabetes-related eye disease.

**Supplemental Table S4 (continued): List of CPT and HCPC codes used to define four treatment types for diabetes-related eye disease**

| <b>CPT/HCPC Code</b> | <b>CPT/HCPC Code Description</b>                                                                                                                                                                                                             | <b>Claim-level additional required codes</b> | <b>Patient-level required diagnosis</b> | <b>Aggregated treatment type</b> |
|----------------------|----------------------------------------------------------------------------------------------------------------------------------------------------------------------------------------------------------------------------------------------|----------------------------------------------|-----------------------------------------|----------------------------------|
| 67041                | Vitrectomy, mechanical, pars plana approach; with removal of preretinal cellular membrane (e.g., macular pucker)                                                                                                                             | N/A                                          | Diabetic Eye Diseases                   | Vitrectomy                       |
| 67042                | Vitrectomy, mechanical, pars plana approach; with removal of internal limiting membrane of retina (e.g., for repair of macular hole, diabetic macular edema), includes, if performed, intraocular tamponade (i.e., air, gas or silicone oil) | N/A                                          | Diabetic Eye Diseases                   | Vitrectomy                       |
| 67043                | Vitrectomy, mechanical, pars plana approach; with removal of subretinal membrane (e.g., choroidal neovascularization), includes, if performed, intraocular tamponade (i.e., air, gas or silicone oil) and laser photocoagulation             | N/A                                          | Diabetic Eye Diseases                   | Vitrectomy                       |
| 67105                | Repair of retinal detachment, including drainage of subretinal fluid when performed; photocoagulation                                                                                                                                        | N/A                                          | Diabetic Eye Diseases                   | Retinal detachment repair        |
| 67145                | Prophylaxis of retinal detachment (e.g., retinal break, lattice degeneration) without drainage, one or more sessions; photocoagulation (laser or xenon arc)                                                                                  | N/A                                          | Diabetic Eye Diseases                   | Retinal detachment repair        |
| 67107                | Repair of retinal detachment; scleral buckling (such as lamellar scleral dissection, imbrication or encircling procedure), including, when performed, implant, cryotherapy, photocoagulation, and drainage of subretinal fluid               | N/A                                          | Diabetic Eye Diseases                   | Retinal detachment repair        |
| 67110                | Repair of retinal detachment; by injection of air or other gas (e.g., pneumatic retinopexy)                                                                                                                                                  | N/A                                          | Diabetic Eye Diseases                   | Retinal detachment repair        |
| 67108                | Repair of retinal detachment; with vitrectomy, any method                                                                                                                                                                                    | N/A                                          | Diabetic Eye Diseases                   | Retinal detachment repair        |
| 67113                | Repair of complex retinal detachment (micropulse/retinex)                                                                                                                                                                                    | N/A                                          | Diabetic Eye Diseases                   | Retinal detachment repair        |

Abbreviations: CPT (Current Procedural Terminology), HCPC (Healthcare Common Procedure Coding), VEGF (vascular endothelial growth factor). Diabetic eye disease defined as any of the three groups listed in eTables 1-3: 1. Diabetic macular edema or vision-threatening diabetic retinopathy, 2. Diabetic macular edema of any type, or 3. Non-vision-threatening diabetes-related eye disease.

**Supplemental Table S5. ICD9 and ICD10 diagnosis codes used to define vision-threatening diabetic retinopathy without diabetic macular edema (VTDR without DME)<sup>a</sup>**

| <b>Code</b>                                         | <b>Description</b>                                                                                                                                                                                                                                                                                                                                                                                                                                                                                                                                                                                                                                                                                                                                                            |
|-----------------------------------------------------|-------------------------------------------------------------------------------------------------------------------------------------------------------------------------------------------------------------------------------------------------------------------------------------------------------------------------------------------------------------------------------------------------------------------------------------------------------------------------------------------------------------------------------------------------------------------------------------------------------------------------------------------------------------------------------------------------------------------------------------------------------------------------------|
| 362.06<br>(without<br>362.07)                       | Severe non-proliferative diabetic retinopathy<br>(without diabetic macular edema)                                                                                                                                                                                                                                                                                                                                                                                                                                                                                                                                                                                                                                                                                             |
| 362.02<br>(without<br>362.07)                       | Proliferative diabetic retinopathy<br>(without diabetic macular edema)                                                                                                                                                                                                                                                                                                                                                                                                                                                                                                                                                                                                                                                                                                        |
| E08.349<br>E09.349<br>E10.349<br>E11.349<br>E13.349 | Severe non-proliferative diabetic retinopathy without macular edema (diabetes mellitus due to underlying condition)<br>Severe non-proliferative diabetic retinopathy without macular edema (drug/chemical-induced diabetes mellitus)<br>Severe non-proliferative diabetic retinopathy without macular edema (type 1 diabetes mellitus)<br>Severe non-proliferative diabetic retinopathy without macular edema (type 2 diabetes mellitus)<br>Severe non-proliferative diabetic retinopathy without macular edema (other specified diabetes mellitus)                                                                                                                                                                                                                           |
| E08.359<br>E09.359<br>E10.359<br>E11.359<br>E13.359 | Proliferative diabetic retinopathy without macular edema (diabetes mellitus due to underlying condition)<br>Proliferative diabetic retinopathy without macular edema (drug/chemical-induced diabetes mellitus)<br>Proliferative diabetic retinopathy without macular edema (type 1 diabetes mellitus)<br>Proliferative diabetic retinopathy without macular edema (type 2 diabetes mellitus)<br>Proliferative diabetic retinopathy without macular edema (other specified diabetes mellitus)                                                                                                                                                                                                                                                                                  |
| E08.352<br>E09.352<br>E10.352<br>E11.352<br>E13.352 | Proliferative diabetic retinopathy with traction retinal detachment involving the macula (diabetes mellitus due to underlying condition)<br>Proliferative diabetic retinopathy with traction retinal detachment involving the macula (drug/chemical induced diabetes mellitus)<br>Proliferative diabetic retinopathy with traction retinal detachment involving the macula (type 1 diabetes mellitus)<br>Proliferative diabetic retinopathy with traction retinal detachment involving the macula (type 2 diabetes mellitus)<br>Proliferative diabetic retinopathy with traction retinal detachment involving the macula (other specified diabetes mellitus)                                                                                                                  |
| E08.353<br>E09.353<br>E10.353<br>E11.353<br>E13.353 | Proliferative diabetic retinopathy with traction retinal detachment not involving macula (diabetes mellitus due to underlying condition)<br>Proliferative diabetic retinopathy with traction retinal detachment not involving macula (drug/chemical induced diabetes mellitus)<br>Proliferative diabetic retinopathy with traction retinal detachment not involving the macula (type 1 diabetes mellitus)<br>Proliferative diabetic retinopathy with traction retinal detachment not involving the macula (type 2 diabetes mellitus)<br>proliferative diabetic retinopathy with traction retinal detachment not involving the macula (other specified diabetes mellitus)                                                                                                      |
| E08.354<br>E09.354<br>E10.354<br>E11.354<br>E13.354 | Proliferative diabetic retinopathy with combined traction retinal detachment & rhegmatogenous retinal detachment (diabetes mellitus underlying condition)<br>Proliferative diabetic retinopathy with combined traction retinal detachment & rhegmatogenous retinal detachment (drug/chemical induced diabetes mellitus)<br>Proliferative diabetic retinopathy with combined traction retinal detachment & rhegmatogenous retinal detachment (type 1 diabetes mellitus)<br>Proliferative diabetic retinopathy with combined traction retinal detachment & rhegmatogenous retinal detachment (type 2 diabetes mellitus)<br>Proliferative diabetic retinopathy with combined traction retinal detachment & rhegmatogenous retinal detachment (other specified diabetes mellitus) |
| E08.355<br>E09.355<br>E10.355<br>E11.355<br>E13.355 | Stable proliferative diabetic retinopathy (diabetes mellitus due to underlying condition)<br>Stable proliferative diabetic retinopathy (drug or chemical induced diabetes mellitus)<br>Stable proliferative diabetic retinopathy (type 1 diabetes mellitus)<br>Stable proliferative diabetic retinopathy (type 2 diabetes mellitus)<br>Stable proliferative diabetic retinopathy (other specified diabetes mellitus)                                                                                                                                                                                                                                                                                                                                                          |

<sup>a</sup> A Vision-threatening diabetic retinopathy without diabetic macular edema is characterized as: severe non-proliferative diabetic retinopathy (without diabetic macular edema) or proliferative diabetic retinopathy (without diabetic macular edema).



**Supplemental Table S6. ICD9 and ICD10 diagnosis codes used to define vision-threatening diabetic retinopathy with diabetic macular edema (VTDR with DME)<sup>a</sup>**

| <b>Code</b>             | <b>Description</b>                                                                                               |
|-------------------------|------------------------------------------------------------------------------------------------------------------|
| 362.06<br>(with 362.07) | Severe non-proliferative diabetic retinopathy (diabetic macular edema)                                           |
| 362.02<br>(with 362.07) | Proliferative diabetic retinopathy (with diabetic macular edema)                                                 |
| E08.341                 | Severe non-proliferative diabetic retinopathy with macular edema (diabetes mellitus due to underlying condition) |
| E09.341                 | Severe non-proliferative diabetic retinopathy with macular edema (drug or chemical induced diabetes mellitus)    |
| E10.341                 | Severe non-proliferative diabetic retinopathy with macular edema (type 1 diabetes mellitus)                      |
| E11.341                 | Severe non-proliferative diabetic retinopathy with macular edema (type 2 diabetes mellitus)                      |
| E13.341                 | Severe non-proliferative diabetic retinopathy with macular edema (other specified diabetes mellitus)             |
| E08.351                 | Proliferative diabetic retinopathy with macular edema (diabetes mellitus due to underlying condition)            |
| E09.351                 | Proliferative diabetic retinopathy with macular edema (drug or chemical induced diabetes mellitus)               |
| E10.351                 | Proliferative diabetic retinopathy with macular edema (type 1 diabetes mellitus)                                 |
| E11.351                 | Proliferative diabetic retinopathy with macular edema (type 2 diabetes mellitus)                                 |
| E13.351                 | Proliferative diabetic retinopathy with macular edema (other specified diabetes mellitus)                        |

<sup>a</sup> Vision-threatening diabetic retinopathy with diabetic macular edema is characterized as: severe non-proliferative diabetic retinopathy (with diabetic macular edema) or proliferative diabetic retinopathy (with diabetic macular edema).

**Supplemental Table S7. ICD9 and ICD10 diagnosis codes used to define any diabetic macular edema (any DME)<sup>a</sup>**

| <b>Code</b> | <b>Description</b>                                                                                                 |
|-------------|--------------------------------------------------------------------------------------------------------------------|
| 362.07      | Diabetic macular edema                                                                                             |
| E08.311     | Unspecified diabetic retinopathy with macular edema (diabetes mellitus due to underlying condition)                |
| E09.311     | Unspecified diabetic retinopathy with macular edema (drug or chemical induced diabetes mellitus)                   |
| E10.311     | Unspecified diabetic retinopathy with macular edema (type 1 diabetes mellitus)                                     |
| E11.311     | Unspecified diabetic retinopathy with macular edema (type 2 diabetes mellitus)                                     |
| E13.311     | Unspecified diabetic retinopathy with macular edema (other specified diabetes mellitus)                            |
| E08.321     | Mild non-proliferative diabetic retinopathy with macular edema (diabetes mellitus due to underlying condition)     |
| E09.321     | Mild non-proliferative diabetic retinopathy with macular edema (drug or chemical induced diabetes mellitus)        |
| E10.321     | Mild non-proliferative diabetic retinopathy with macular edema (type 1 diabetes mellitus)                          |
| E11.321     | Mild non-proliferative diabetic retinopathy with macular edema (type 2 diabetes mellitus)                          |
| E13.321     | Mild non-proliferative diabetic retinopathy with macular edema (other specified diabetes mellitus)                 |
| E08.331     | Moderate non-proliferative diabetic retinopathy with macular edema (diabetes mellitus due to underlying condition) |
| E09.331     | Moderate non-proliferative diabetic retinopathy with macular edema (drug or chemical induced diabetes mellitus)    |
| E10.331     | Moderate non-proliferative diabetic retinopathy with macular edema (type 1 diabetes mellitus)                      |
| E11.331     | Moderate non-proliferative diabetic retinopathy with macular edema (type 2 diabetes mellitus)                      |
| E13.331     | Moderate non-proliferative diabetic retinopathy with macular edema (other specified diabetes mellitus)             |
| E08.341     | Severe non-proliferative diabetic retinopathy with macular edema (diabetes mellitus due to underlying condition)   |
| E09.341     | Severe non-proliferative diabetic retinopathy with macular edema (drug or chemical induced diabetes mellitus)      |
| E10.341     | Severe non-proliferative diabetic retinopathy with macular edema (type 1 diabetes mellitus)                        |
| E11.341     | Severe non-proliferative diabetic retinopathy with macular edema (type 2 diabetes mellitus)                        |
| E13.341     | Severe non-proliferative diabetic retinopathy with macular edema (other specified diabetes mellitus)               |
| E08.351     | Proliferative diabetic retinopathy with macular edema (diabetes mellitus due to underlying condition)              |
| E09.351     | Proliferative diabetic retinopathy with macular edema (drug or chemical induced diabetes mellitus)                 |
| E10.351     | Proliferative diabetic retinopathy with macular edema (type 1 diabetes mellitus)                                   |
| E11.351     | Proliferative diabetic retinopathy with macular edema (type 2 diabetes mellitus)                                   |
| E13.351     | Proliferative diabetic retinopathy with macular edema (other specified diabetes mellitus)                          |
| E08.37X     | Diabetic macular edema, resolved following treatment (diabetes mellitus due to underlying condition)               |
| E09.37X     | Diabetic macular edema, resolved following treatment (drug or chemical induced diabetes mellitus)                  |
| E10.37X     | Diabetic macular edema, resolved following treatment (type 1 diabetes mellitus)                                    |
| E11.37X     | Diabetic macular edema, resolved following treatment (type 2 diabetes mellitus)                                    |
| E13.37X     | Diabetic macular edema, resolved following treatment (other specified diabetes mellitus)                           |

<sup>a</sup> Any diabetic macular edema is characterized as: any ICD9/ICD10 code that contains a diagnosis of diabetic macular edema (by itself or with any stage of diabetic retinopathy).

**Supplemental Table S8.** Statistical Comparison (Wald Test) of the Annual Prevalence of Diabetic Macular Edema or Vision-Threatening Diabetic Retinopathy (DME/VTDR) to Determine Differences by Sex, Age Groups, and Six Age and Sex Groups

| <b>2009</b>        |            |            |            |              |              |
|--------------------|------------|------------|------------|--------------|--------------|
| <b>Sex</b>         | Male       |            |            |              |              |
| Female             | 0.2736     |            |            |              |              |
| <b>Age (years)</b> | 18-44      | 45-54      |            |              |              |
| 45-54              | 0.0000     |            |            |              |              |
| 55-64              | 0.0000     | 0.0000     |            |              |              |
| <b>Sex*Age</b>     | Male 18-44 | Male 45-54 | Male 55-64 | Female 18-44 | Female 45-54 |
| Male 45-54         | 0.0001     |            |            |              |              |
| Male 55-64         | 0.0000     | 0.0000     |            |              |              |
| Female 18-44       | 0.0000     | 0.0000     | 0.0000     |              |              |
| Female 45-54       | 0.0035     | 0.2949     | 0.0000     | 0.0000       |              |
| Female 55-64       | 0.0000     | 0.0000     | 0.0011     | 0.0000       | 0.0000       |
| <b>2010</b>        |            |            |            |              |              |
| <b>Sex</b>         | Male       |            |            |              |              |
| Female             | 0.0054     |            |            |              |              |
| <b>Age (years)</b> | 18-44      | 45-54      |            |              |              |
| 45-54              | 0.0000     |            |            |              |              |
| 55-64              | 0.0000     | 0.0000     |            |              |              |
| <b>Sex*Age</b>     | Male 18-44 | Male 45-54 | Male 55-64 | Female 18-44 | Female 45-54 |
| Male 45-54         | 0.0001     |            |            |              |              |
| Male 55-64         | 0.0000     | 0.0000     |            |              |              |
| Female 18-44       | 0.0000     | 0.0000     | 0.0000     |              |              |
| Female 45-54       | 0.0047     | 0.0322     | 0.0000     | 0.0000       |              |
| Female 55-64       | 0.0000     | 0.0000     | 0.2470     | 0.0000       | 0.0000       |
| <b>2011</b>        |            |            |            |              |              |
| <b>Sex</b>         | Male       |            |            |              |              |
| Female             | 0.0000     |            |            |              |              |
| <b>Age (years)</b> | 18-44      | 45-54      |            |              |              |
| 45-54              | 0.0000     |            |            |              |              |
| 55-64              | 0.0000     | 0.0000     |            |              |              |
| <b>Sex*Age</b>     | Male 18-44 | Male 45-54 | Male 55-64 | Female 18-44 | Female 45-54 |
| Male 45-54         | 0.0018     |            |            |              |              |
| Male 55-64         | 0.0000     | 0.0010     |            |              |              |
| Female 18-44       | 0.0000     | 0.0000     | 0.0000     |              |              |
| Female 45-54       | 0.2764     | 0.0000     | 0.0000     | 0.0000       |              |
| Female 55-64       | 0.0000     | 0.0000     | 0.1039     | 0.0000       | 0.0000       |

**Supplemental Table S8 (continued).** Statistical Comparison (Wald Test) of the Annual Prevalence of Diabetic Macular Edema or Vision-Threatening Diabetic Retinopathy (DME/VTDR) to Determine Differences by Sex, Age Groups, and Six Age and Sex Groups

| <b>2012</b>        |            |            |            |              |              |
|--------------------|------------|------------|------------|--------------|--------------|
| <b>Sex</b>         | Male       |            |            |              |              |
| Female             | 0.0000     |            |            |              |              |
| <b>Age (years)</b> | 18-44      | 45-54      |            |              |              |
| 45-54              | 0.0000     |            |            |              |              |
| 55-64              | 0.0000     | 0.0000     |            |              |              |
| <b>Sex*Age</b>     | Male 18-44 | Male 45-54 | Male 55-64 | Female 18-44 | Female 45-54 |
| Male 45-54         | 0.0000     |            |            |              |              |
| Male 55-64         | 0.0000     | 0.0000     |            |              |              |
| Female 18-44       | 0.0000     | 0.0000     | 0.0000     |              |              |
| Female 45-54       | 0.1967     | 0.0000     | 0.0000     | 0.0000       |              |
| Female 55-64       | 0.0000     | 0.0000     | 0.6716     | 0.0000       | 0.0000       |
| <b>2013</b>        |            |            |            |              |              |
| <b>Sex</b>         | Male       |            |            |              |              |
| Female             | 0.0000     |            |            |              |              |
| <b>Age (years)</b> | 18-44      | 45-54      |            |              |              |
| 45-54              | 0.0000     |            |            |              |              |
| 55-64              | 0.0000     | 0.0000     |            |              |              |
| <b>Sex*Age</b>     | Male 18-44 | Male 45-54 | Male 55-64 | Female 18-44 | Female 45-54 |
| Male 45-54         | 0.0000     |            |            |              |              |
| Male 55-64         | 0.0000     | 0.0001     |            |              |              |
| Female 18-44       | 0.0000     | 0.0000     | 0.0000     |              |              |
| Female 45-54       | 0.7969     | 0.0000     | 0.0000     | 0.0000       |              |
| Female 55-64       | 0.0000     | 0.0004     | 0.7276     | 0.0000       | 0.0000       |
| <b>2014</b>        |            |            |            |              |              |
| <b>Sex</b>         | Male       |            |            |              |              |
| Female             | 0.0000     |            |            |              |              |
| <b>Age (years)</b> | 18-44      | 45-54      |            |              |              |
| 45-54              | 0.0000     |            |            |              |              |
| 55-64              | 0.0000     | 0.0000     |            |              |              |
| <b>Sex*Age</b>     | Male 18-44 | Male 45-54 | Male 55-64 | Female 18-44 | Female 45-54 |
| Male 45-54         | 0.0000     |            |            |              |              |
| Male 55-64         | 0.0000     | 0.0002     |            |              |              |
| Female 18-44       | 0.0000     | 0.0000     | 0.0000     |              |              |
| Female 45-54       | 0.9100     | 0.0000     | 0.0000     | 0.0000       |              |
| Female 55-64       | 0.0000     | 0.0007     | 0.7514     | 0.0000       | 0.0000       |

**Supplemental Table S8 (continued).** Statistical Comparison (Wald Test) of the Annual Prevalence of Diabetic Macular Edema or Vision-Threatening Diabetic Retinopathy (DME/VTDR) to Determine Differences by Sex, Age Groups, and Six Age and Sex Groups

| <b>2015</b>        |            |            |            |              |              |
|--------------------|------------|------------|------------|--------------|--------------|
| <b>Sex</b>         | Male       |            |            |              |              |
| Female             | 0.0000     |            |            |              |              |
| <b>Age (years)</b> | 18-44      | 45-54      |            |              |              |
| 45-54              | 0.0000     |            |            |              |              |
| 55-64              | 0.0000     | 0.0000     |            |              |              |
| <b>Sex*Age</b>     | Male 18-44 | Male 45-54 | Male 55-64 | Female 18-44 | Female 45-54 |
| Male 45-54         | 0.0000     |            |            |              |              |
| Male 55-64         | 0.0000     | 0.0000     |            |              |              |
| Female 18-44       | 0.0000     | 0.0000     | 0.0000     |              |              |
| Female 45-54       | 0.0524     | 0.0000     | 0.0000     | 0.0000       |              |
| Female 55-64       | 0.0000     | 0.0487     | 0.0083     | 0.0000       | 0.0000       |
| <b>2016</b>        |            |            |            |              |              |
| <b>Sex</b>         | Male       |            |            |              |              |
| Female             | 0.0000     |            |            |              |              |
| <b>Age (years)</b> | 18-44      | 45-54      |            |              |              |
| 45-54              | 0.0000     |            |            |              |              |
| 55-64              | 0.0000     | 0.0000     |            |              |              |
| <b>Sex*Age</b>     | Male 18-44 | Male 45-54 | Male 55-64 | Female 18-44 | Female 45-54 |
| Male 45-54         | 0.0000     |            |            |              |              |
| Male 55-64         | 0.0000     | 0.0026     |            |              |              |
| Female 18-44       | 0.0000     | 0.0000     | 0.0000     |              |              |
| Female 45-54       | 0.0288     | 0.0000     | 0.0000     | 0.0000       |              |
| Female 55-64       | 0.0000     | 0.5433     | 0.0067     | 0.0000       | 0.0000       |
| <b>2017</b>        |            |            |            |              |              |
| <b>Sex</b>         | Male       |            |            |              |              |
| Female             | 0.0000     |            |            |              |              |
| <b>Age (years)</b> | 18-44      | 45-54      |            |              |              |
| 45-54              | 0.0000     |            |            |              |              |
| 55-64              | 0.0000     | 0.0000     |            |              |              |
| <b>Sex*Age</b>     | Male 18-44 | Male 45-54 | Male 55-64 | Female 18-44 | Female 45-54 |
| Male 45-54         | 0.0000     |            |            |              |              |
| Male 55-64         | 0.0000     | 0.0273     |            |              |              |
| Female 18-44       | 0.0000     | 0.0000     | 0.0000     |              |              |
| Female 45-54       | 0.3357     | 0.0000     | 0.0000     | 0.0000       |              |
| Female 55-64       | 0.0000     | 0.5670     | 0.0677     | 0.0000       | 0.0000       |

**Supplemental Table S8 (continued).** Statistical Comparison (Wald Test) of the Annual Prevalence of Diabetic Macular Edema or Vision-Threatening Diabetic Retinopathy (DME/VTDR) to Determine Differences by Sex, Age Groups, and Six Age and Sex Groups

| <b>2018</b>        |            |            |            |              |              |
|--------------------|------------|------------|------------|--------------|--------------|
| <b>Sex</b>         | Male       |            |            |              |              |
| Female             | 0.0000     |            |            |              |              |
| <b>Age (years)</b> | 18-44      | 45-54      |            |              |              |
| 45-54              | 0.0000     |            |            |              |              |
| 55-64              | 0.0000     | 0.0000     |            |              |              |
| <b>Sex*Age</b>     | Male 18-44 | Male 45-54 | Male 55-64 | Female 18-44 | Female 45-54 |
| Male 45-54         | 0.0000     |            |            |              |              |
| Male 55-64         | 0.0000     | 0.0086     |            |              |              |
| Female 18-44       | 0.0000     | 0.0000     | 0.0000     |              |              |
| Female 45-54       | 0.1186     | 0.0000     | 0.0000     | 0.0000       |              |
| Female 55-64       | 0.0000     | 0.7438     | 0.0011     | 0.0000       | 0.0000       |

**Supplemental Table S9.** Statistical Comparison (Wald Test) of the Annual Prevalence of Any Diabetic Macular Edema (any DME) to Determine Differences by Sex, Age Groups, and Six Age and Sex Groups

| <b>2009</b>        |            |            |            |              |              |
|--------------------|------------|------------|------------|--------------|--------------|
| <b>Sex</b>         | Male       |            |            |              |              |
| Female             | 0.1016     |            |            |              |              |
| <b>Age (years)</b> | 18-44      | 45-54      |            |              |              |
| 45-54              | 0.0000     |            |            |              |              |
| 55-64              | 0.0000     | 0.0000     |            |              |              |
| <b>Sex*Age</b>     | Male 18-44 | Male 45-54 | Male 55-64 | Female 18-44 | Female 45-54 |
| Male 45-54         | 0.0000     |            |            |              |              |
| Male 55-64         | 0.0000     | 0.0000     |            |              |              |
| Female 18-44       | 0.0000     | 0.0000     | 0.0000     |              |              |
| Female 45-54       | 0.0002     | 0.1670     | 0.0000     | 0.0000       |              |
| Female 55-64       | 0.0000     | 0.0000     | 0.0256     | 0.0000       | 0.0000       |
| <b>2010</b>        |            |            |            |              |              |
| <b>Sex</b>         | Male       |            |            |              |              |
| Female             | 0.0010     |            |            |              |              |
| <b>Age (years)</b> | 18-44      | 45-54      |            |              |              |
| 45-54              | 0.0000     |            |            |              |              |
| 55-64              | 0.0000     | 0.0000     |            |              |              |
| <b>Sex*Age</b>     | Male 18-44 | Male 45-54 | Male 55-64 | Female 18-44 | Female 45-54 |
| Male 45-54         | 0.0000     |            |            |              |              |
| Male 55-64         | 0.0000     | 0.0000     |            |              |              |
| Female 18-44       | 0.0000     | 0.0000     | 0.0000     |              |              |
| Female 45-54       | 0.0024     | 0.0110     | 0.0000     | 0.0000       |              |
| Female 55-64       | 0.0000     | 0.0000     | 0.4635     | 0.0000       | 0.0000       |
| <b>2011</b>        |            |            |            |              |              |
| <b>Sex</b>         | Male       |            |            |              |              |
| Female             | 0.0000     |            |            |              |              |
| <b>Age (years)</b> | 18-44      | 45-54      |            |              |              |
| 45-54              | 0.0000     |            |            |              |              |
| 55-64              | 0.0000     | 0.0000     |            |              |              |
| <b>Sex*Age</b>     | Male 18-44 | Male 45-54 | Male 55-64 | Female 18-44 | Female 45-54 |
| Male 45-54         | 0.0000     |            |            |              |              |
| Male 55-64         | 0.0000     | 0.0037     |            |              |              |
| Female 18-44       | 0.0000     | 0.0000     | 0.0000     |              |              |
| Female 45-54       | 0.5509     | 0.0000     | 0.0000     | 0.0000       |              |
| Female 55-64       | 0.0000     | 0.0004     | 0.4149     | 0.0000       | 0.0000       |

**Supplemental Table S9 (continued).** Statistical Comparison (Wald Test) of the Annual Prevalence of Any Diabetic Macular Edema (any DME) to Determine Differences by Sex, Age Groups, and Six Age and Sex Groups

| <b>2012</b>        |            |            |            |              |              |
|--------------------|------------|------------|------------|--------------|--------------|
| <b>Sex</b>         | Male       |            |            |              |              |
| Female             | 0.0000     |            |            |              |              |
| <b>Age (years)</b> | 18-44      | 45-54      |            |              |              |
| 45-54              | 0.0000     |            |            |              |              |
| 55-64              | 0.0000     | 0.0000     |            |              |              |
| <b>Sex*Age</b>     | Male 18-44 | Male 45-54 | Male 55-64 | Female 18-44 | Female 45-54 |
| Male 45-54         | 0.0000     |            |            |              |              |
| Male 55-64         | 0.0000     | 0.0000     |            |              |              |
| Female 18-44       | 0.0000     | 0.0000     | 0.0000     |              |              |
| Female 45-54       | 0.1283     | 0.0000     | 0.0000     | 0.0000       |              |
| Female 55-64       | 0.0000     | 0.0000     | 0.3016     | 0.0000       | 0.0000       |
| <b>2013</b>        |            |            |            |              |              |
| <b>Sex</b>         | Male       |            |            |              |              |
| Female             | 0.0000     |            |            |              |              |
| <b>Age (years)</b> | 18-44      | 45-54      |            |              |              |
| 45-54              | 0.0000     |            |            |              |              |
| 55-64              | 0.0000     | 0.0000     |            |              |              |
| <b>Sex*Age</b>     | Male 18-44 | Male 45-54 | Male 55-64 | Female 18-44 | Female 45-54 |
| Male 45-54         | 0.0000     |            |            |              |              |
| Male 55-64         | 0.0000     | 0.0000     |            |              |              |
| Female 18-44       | 0.0000     | 0.0000     | 0.0000     |              |              |
| Female 45-54       | 0.5487     | 0.0000     | 0.0000     | 0.0000       |              |
| Female 55-64       | 0.0000     | 0.0000     | 0.2683     | 0.0000       | 0.0000       |
| <b>2014</b>        |            |            |            |              |              |
| <b>Sex</b>         | Male       |            |            |              |              |
| Female             | 0.0000     |            |            |              |              |
| <b>Age (years)</b> | 18-44      | 45-54      |            |              |              |
| 45-54              | 0.0000     |            |            |              |              |
| 55-64              | 0.0000     | 0.0000     |            |              |              |
| <b>Sex*Age</b>     | Male 18-44 | Male 45-54 | Male 55-64 | Female 18-44 | Female 45-54 |
| Male 45-54         | 0.0000     |            |            |              |              |
| Male 55-64         | 0.0000     | 0.0000     |            |              |              |
| Female 18-44       | 0.0000     | 0.0000     | 0.0000     |              |              |
| Female 45-54       | 0.7270     | 0.0000     | 0.0000     | 0.0000       |              |
| Female 55-64       | 0.0000     | 0.0000     | 0.2398     | 0.0000       | 0.0000       |



**Supplemental Table S9 (continued).** Statistical Comparison (Wald Test) of the Annual Prevalence of Any Diabetic Macular Edema (any DME) to Determine Differences by Sex, Age Groups, and Six Age and Sex Groups

| <b>2015</b>        |            |            |            |              |              |
|--------------------|------------|------------|------------|--------------|--------------|
| <b>Sex</b>         | Male       |            |            |              |              |
| Female             | 0.0000     |            |            |              |              |
| <b>Age (years)</b> | 18-44      | 45-54      |            |              |              |
| 45-54              | 0.0000     |            |            |              |              |
| 55-64              | 0.0000     | 0.0000     |            |              |              |
| <b>Sex*Age</b>     | Male 18-44 | Male 45-54 | Male 55-64 | Female 18-44 | Female 45-54 |
| Male 45-54         | 0.0000     |            |            |              |              |
| Male 55-64         | 0.0000     | 0.0000     |            |              |              |
| Female 18-44       | 0.0000     | 0.0000     | 0.0000     |              |              |
| Female 45-54       | 0.3207     | 0.0000     | 0.0000     | 0.0000       |              |
| Female 55-64       | 0.0000     | 0.0079     | 0.0034     | 0.0000       | 0.0000       |
| <b>2016</b>        |            |            |            |              |              |
| <b>Sex</b>         | Male       |            |            |              |              |
| Female             | 0.0000     |            |            |              |              |
| <b>Age (years)</b> | 18-44      | 45-54      |            |              |              |
| 45-54              | 0.0000     |            |            |              |              |
| 55-64              | 0.0000     | 0.0000     |            |              |              |
| <b>Sex*Age</b>     | Male 18-44 | Male 45-54 | Male 55-64 | Female 18-44 | Female 45-54 |
| Male 45-54         | 0.0000     |            |            |              |              |
| Male 55-64         | 0.0000     | 0.0000     |            |              |              |
| Female 18-44       | 0.0000     | 0.0000     | 0.0000     |              |              |
| Female 45-54       | 0.4238     | 0.0000     | 0.0000     | 0.0000       |              |
| Female 55-64       | 0.0000     | 0.0318     | 0.0058     | 0.0000       | 0.0000       |
| <b>2017</b>        |            |            |            |              |              |
| <b>Sex</b>         | Male       |            |            |              |              |
| Female             | 0.0000     |            |            |              |              |
| <b>Age (years)</b> | 18-44      | 45-54      |            |              |              |
| 45-54              | 0.0000     |            |            |              |              |
| 55-64              | 0.0000     | 0.0000     |            |              |              |
| <b>Sex*Age</b>     | Male 18-44 | Male 45-54 | Male 55-64 | Female 18-44 | Female 45-54 |
| Male 45-54         | 0.0000     |            |            |              |              |
| Male 55-64         | 0.0000     | 0.0005     |            |              |              |
| Female 18-44       | 0.0000     | 0.0000     | 0.0000     |              |              |
| Female 45-54       | 0.5494     | 0.0000     | 0.0000     | 0.0000       |              |
| Female 55-64       | 0.0000     | 0.0573     | 0.0867     | 0.0000       | 0.0000       |

**Supplemental Table S9 (continued).** Statistical Comparison (Wald Test) of the Annual Prevalence of Any Diabetic Macular Edema (any DME) to Determine Differences by Sex, Age Groups, and Six Age and Sex Groups

| <b>2018</b>        |            |            |            |              |              |
|--------------------|------------|------------|------------|--------------|--------------|
| <b>Sex</b>         | Male       |            |            |              |              |
| Female             | 0.0000     |            |            |              |              |
| <b>Age (years)</b> | 18-44      | 45-54      |            |              |              |
| 45-54              | 0.0000     |            |            |              |              |
| 55-64              | 0.0000     | 0.0000     |            |              |              |
| <b>Sex*Age</b>     | Male 18-44 | Male 45-54 | Male 55-64 | Female 18-44 | Female 45-54 |
| Male 45-54         | 0.0000     |            |            |              |              |
| Male 55-64         | 0.0000     | 0.0000     |            |              |              |
| Female 18-44       | 0.0000     | 0.0000     | 0.0000     |              |              |
| Female 45-54       | 0.5706     | 0.0000     | 0.0000     | 0.0000       |              |
| Female 55-64       | 0.0000     | 0.3615     | 0.0005     | 0.0000       | 0.0000       |

**Supplemental Table S10.** Statistical Comparison (Wald Test) of the Annual Prevalence of Non-Vision-Threatening Diabetes-Related Eye Disease to Determine Differences by Sex, Age Groups, and Six Age and Sex Groups

| <b>2009</b>        |            |            |            |              |              |
|--------------------|------------|------------|------------|--------------|--------------|
| <b>Sex</b>         | Male       |            |            |              |              |
| Female             | 0.0003     |            |            |              |              |
| <b>Age (years)</b> | 18-44      | 45-54      |            |              |              |
| 45-54              | 0.0000     |            |            |              |              |
| 55-64              | 0.0000     | 0.0000     |            |              |              |
| <b>Sex*Age</b>     | Male 18-44 | Male 45-54 | Male 55-64 | Female 18-44 | Female 45-54 |
| Male 45-54         | 0.0000     |            |            |              |              |
| Male 55-64         | 0.0000     | 0.0000     |            |              |              |
| Female 18-44       | 0.0000     | 0.0000     | 0.0000     |              |              |
| Female 45-54       | 0.0000     | 0.0000     | 0.0000     | 0.0000       |              |
| Female 55-64       | 0.0000     | 0.0000     | 0.0005     | 0.0000       | 0.0000       |
| <b>2010</b>        |            |            |            |              |              |
| <b>Sex</b>         | Male       |            |            |              |              |
| Female             | 0.0000     |            |            |              |              |
| <b>Age (years)</b> | 18-44      | 45-54      |            |              |              |
| 45-54              | 0.0000     |            |            |              |              |
| 55-64              | 0.0000     | 0.0000     |            |              |              |
| <b>Sex*Age</b>     | Male 18-44 | Male 45-54 | Male 55-64 | Female 18-44 | Female 45-54 |
| Male 45-54         | 0.0000     |            |            |              |              |
| Male 55-64         | 0.0000     | 0.0000     |            |              |              |
| Female 18-44       | 0.0000     | 0.0000     | 0.0000     |              |              |
| Female 45-54       | 0.0000     | 0.0000     | 0.0000     | 0.0000       |              |
| Female 55-64       | 0.0000     | 0.0000     | 0.1093     | 0.0000       | 0.0000       |
| <b>2011</b>        |            |            |            |              |              |
| <b>Sex</b>         | Male       |            |            |              |              |
| Female             | 0.0000     |            |            |              |              |
| <b>Age (years)</b> | 18-44      | 45-54      |            |              |              |
| 45-54              | 0.0000     |            |            |              |              |
| 55-64              | 0.0000     | 0.0000     |            |              |              |
| <b>Sex*Age</b>     | Male 18-44 | Male 45-54 | Male 55-64 | Female 18-44 | Female 45-54 |
| Male 45-54         | 0.0000     |            |            |              |              |
| Male 55-64         | 0.0000     | 0.0000     |            |              |              |
| Female 18-44       | 0.0000     | 0.0000     | 0.0000     |              |              |
| Female 45-54       | 0.0002     | 0.0000     | 0.0000     | 0.0000       |              |
| Female 55-64       | 0.0000     | 0.0000     | 0.2984     | 0.0000       | 0.0000       |

**Supplemental Table S10 (continued).** Statistical Comparison (Wald Test) of the Annual Prevalence of Non-Vision-Threatening Diabetes-Related Eye Disease to Determine Differences by Sex, Age Groups, and Six Age and Sex Groups

| <b>2012</b>        |            |            |            |              |              |
|--------------------|------------|------------|------------|--------------|--------------|
| <b>Sex</b>         | Male       |            |            |              |              |
| Female             | 0.0000     |            |            |              |              |
| <b>Age (years)</b> | 18-44      | 45-54      |            |              |              |
| 45-54              | 0.0000     |            |            |              |              |
| 55-64              | 0.0000     |            |            |              |              |
|                    |            |            |            |              |              |
| <b>Sex*Age</b>     | Male 18-44 | Male 45-54 | Male 55-64 | Female 18-44 | Female 45-54 |
| Male 45-54         | 0.0000     |            |            |              |              |
| Male 55-64         | 0.0000     |            |            |              |              |
| Female 18-44       | 0.0000     |            |            |              |              |
| Female 45-54       | 0.0000     |            |            |              |              |
| Female 55-64       | 0.0000     |            |            |              |              |
|                    |            |            | 0.0000     |              |              |
|                    |            |            |            | 0.0000       |              |
|                    |            |            | 0.6959     | 0.0000       | 0.0000       |
| <b>2013</b>        |            |            |            |              |              |
| <b>Sex</b>         | Male       |            |            |              |              |
| Female             | 0.0000     |            |            |              |              |
| <b>Age (years)</b> | 18-44      | 45-54      |            |              |              |
| 45-54              | 0.0000     |            |            |              |              |
| 55-64              | 0.0000     |            |            |              |              |
|                    |            |            |            |              |              |
| <b>Sex*Age</b>     | Male 18-44 | Male 45-54 | Male 55-64 | Female 18-44 | Female 45-54 |
| Male 45-54         | 0.0000     |            |            |              |              |
| Male 55-64         | 0.0000     |            |            |              |              |
| Female 18-44       | 0.0000     |            |            |              |              |
| Female 45-54       | 0.0003     |            |            |              |              |
| Female 55-64       | 0.0000     |            |            |              |              |
|                    |            |            | 0.0000     |              |              |
|                    |            |            | 0.0254     | 0.0000       | 0.0000       |
| <b>2014</b>        |            |            |            |              |              |
| <b>Sex</b>         | Male       |            |            |              |              |
| Female             | 0.0000     |            |            |              |              |
| <b>Age (years)</b> | 18-44      | 45-54      |            |              |              |
| 45-54              | 0.0000     |            |            |              |              |
| 55-64              | 0.0000     |            |            |              |              |
|                    |            |            |            |              |              |
| <b>Sex*Age</b>     | Male 18-44 | Male 45-54 | Male 55-64 | Female 18-44 | Female 45-54 |
| Male 45-54         | 0.0000     |            |            |              |              |
| Male 55-64         | 0.0000     |            |            |              |              |
| Female 18-44       | 0.0000     |            |            |              |              |
| Female 45-54       | 0.0000     |            |            |              |              |
| Female 55-64       | 0.0000     |            |            |              |              |
|                    |            |            | 0.0000     |              |              |
|                    |            |            | 0.1042     | 0.0000       | 0.0000       |

**Supplemental Table S10 (continued).** Statistical Comparison (Wald Test) of the Annual Prevalence of Non-Vision-Threatening Diabetes-Related Eye Disease to Determine Differences by Sex, Age Groups, and Six Age and Sex Groups

| <b>2015</b>    |            |            |            |              |              |
|----------------|------------|------------|------------|--------------|--------------|
| <b>Sex</b>     | Male       |            |            |              |              |
| Female         | 0.0000     |            |            |              |              |
| <b>Age</b>     | 18-44      | 45-54      |            |              |              |
| 45-54          | 0.0000     |            |            |              |              |
| 55-64          | 0.0000     | 0.0000     |            |              |              |
| <b>Sex*Age</b> | Male 18-44 | Male 45-54 | Male 55-64 | Female 18-44 | Female 45-54 |
| Male 45-54     | 0.0000     |            |            |              |              |
| Male 55-64     | 0.0000     | 0.0000     |            |              |              |
| Female 18-44   | 0.0000     | 0.0000     | 0.0000     |              |              |
| Female 45-54   | 0.0001     | 0.0000     | 0.0000     | 0.0000       |              |
| Female 55-64   | 0.0000     | 0.0000     | 0.0062     | 0.0000       | 0.0000       |
| <b>2016</b>    |            |            |            |              |              |
| <b>Sex</b>     | Male       |            |            |              |              |
| Female         | 0.0000     |            |            |              |              |
| <b>Age</b>     | 18-44      | 45-54      |            |              |              |
| 45-54          | 0.0000     |            |            |              |              |
| 55-64          | 0.0000     | 0.0000     |            |              |              |
| <b>Sex*Age</b> | Male 18-44 | Male 45-54 | Male 55-64 | Female 18-44 | Female 45-54 |
| Male 45-54     | 0.0000     |            |            |              |              |
| Male 55-64     | 0.0000     | 0.0000     |            |              |              |
| Female 18-44   | 0.0000     | 0.0000     | 0.0000     |              |              |
| Female 45-54   | 0.6858     | 0.0000     | 0.0000     | 0.0000       |              |
| Female 55-64   | 0.0000     | 0.0001     | 0.0000     | 0.0000       | 0.0000       |
| <b>2017</b>    |            |            |            |              |              |
| <b>Sex</b>     | Male       |            |            |              |              |
| Female         | 0.0000     |            |            |              |              |
| <b>Age</b>     | 18-44      | 45-54      |            |              |              |
| 45-54          | 0.0000     |            |            |              |              |
| 55-64          | 0.0000     | 0.0000     |            |              |              |
| <b>Sex*Age</b> | Male 18-44 | Male 45-54 | Male 55-64 | Female 18-44 | Female 45-54 |
| Male 45-54     | 0.0000     |            |            |              |              |
| Male 55-64     | 0.0000     | 0.0000     |            |              |              |
| Female 18-44   | 0.0000     | 0.0000     | 0.0000     |              |              |
| Female 45-54   | 0.0503     | 0.0000     | 0.0000     | 0.0000       |              |
| Female 55-64   | 0.0000     | 0.0000     | 0.0000     | 0.0000       | 0.0000       |

**Supplemental Table S10 (continued).** Statistical Comparison (Wald Test) of the Annual Prevalence of Non-Vision-Threatening Diabetes-Related Eye Disease to Determine Differences by Sex, Age Groups, and Six Age and Sex Groups

| <b>2018</b>    |            |            |            |              |              |
|----------------|------------|------------|------------|--------------|--------------|
| <b>Sex</b>     | Male       |            |            |              |              |
| Female         | 0.0000     |            |            |              |              |
| <b>Age</b>     | 18-44      | 45-54      |            |              |              |
| 45-54          | 0.0000     |            |            |              |              |
| 55-64          | 0.0000     | 0.0000     |            |              |              |
| <b>Sex*Age</b> | Male 18-44 | Male 45-54 | Male 55-64 | Female 18-44 | Female 45-54 |
| Male 45-54     | 0.0000     |            |            |              |              |
| Male 55-64     | 0.0000     | 0.0000     |            |              |              |
| Female 18-44   | 0.0000     | 0.0000     | 0.0000     |              |              |
| Female 45-54   | 0.5621     | 0.0000     | 0.0000     | 0.0000       |              |
| Female 55-64   | 0.0000     | 0.0079     | 0.0000     | 0.0000       | 0.0000       |

| <b>Supplemental Table S11.</b> Annual prevalence of having ≥1 claim for diabetic macular edema or vision-threatening diabetic retinopathy (DME/VTDR) among adults 18–64 years of age with diabetes, IBM® MarketScan® Database (2009–2018) |      |        |      |       |        |      |         |        |      |             |        |      |             |        |      |             |        |      |
|-------------------------------------------------------------------------------------------------------------------------------------------------------------------------------------------------------------------------------------------|------|--------|------|-------|--------|------|---------|--------|------|-------------|--------|------|-------------|--------|------|-------------|--------|------|
|                                                                                                                                                                                                                                           | All  |        |      | Males |        |      | Females |        |      | 18-44 years |        |      | 45-54 years |        |      | 55-64 years |        |      |
| Year                                                                                                                                                                                                                                      | %    | 95% CI |      | %     | 95% CI |      | %       | 95% CI |      | %           | 95% CI |      | %           | 95% CI |      | %           | 95% CI |      |
| 2009                                                                                                                                                                                                                                      | 2.07 | 2.05   | 2.10 | 2.09  | 2.05   | 2.12 | 2.06    | 2.02   | 2.10 | 1.60        | 1.55   | 1.66 | 1.97        | 1.93   | 2.02 | 2.31        | 2.27   | 2.35 |
| 2010                                                                                                                                                                                                                                      | 1.99 | 1.96   | 2.02 | 2.03  | 1.99   | 2.06 | 1.95    | 1.91   | 1.99 | 1.56        | 1.50   | 1.62 | 1.93        | 1.88   | 1.98 | 2.18        | 2.14   | 2.22 |
| 2011                                                                                                                                                                                                                                      | 1.84 | 1.81   | 1.86 | 1.90  | 1.86   | 1.93 | 1.78    | 1.74   | 1.81 | 1.50        | 1.45   | 1.55 | 1.76        | 1.72   | 1.80 | 2.01        | 1.98   | 2.05 |
| 2012                                                                                                                                                                                                                                      | 2.13 | 2.11   | 2.15 | 2.21  | 2.18   | 2.25 | 2.04    | 2.01   | 2.07 | 1.63        | 1.58   | 1.68 | 2.04        | 2.00   | 2.08 | 2.37        | 2.34   | 2.41 |
| 2013                                                                                                                                                                                                                                      | 2.20 | 2.17   | 2.23 | 2.29  | 2.26   | 2.33 | 2.10    | 2.06   | 2.14 | 1.72        | 1.66   | 1.78 | 2.12        | 2.07   | 2.17 | 2.42        | 2.38   | 2.46 |
| 2014                                                                                                                                                                                                                                      | 2.46 | 2.43   | 2.49 | 2.57  | 2.53   | 2.61 | 2.34    | 2.30   | 2.38 | 1.92        | 1.86   | 1.98 | 2.37        | 2.32   | 2.42 | 2.72        | 2.68   | 2.76 |
| 2015                                                                                                                                                                                                                                      | 2.86 | 2.82   | 2.89 | 3.01  | 2.96   | 3.06 | 2.69    | 2.64   | 2.73 | 2.14        | 2.07   | 2.21 | 2.78        | 2.72   | 2.84 | 3.16        | 3.11   | 3.21 |
| 2016                                                                                                                                                                                                                                      | 3.24 | 3.21   | 3.28 | 3.44  | 3.39   | 3.49 | 3.03    | 2.98   | 3.08 | 2.37        | 2.30   | 2.45 | 3.17        | 3.11   | 3.24 | 3.60        | 3.55   | 3.65 |
| 2017                                                                                                                                                                                                                                      | 3.28 | 3.24   | 3.32 | 3.47  | 3.42   | 3.53 | 3.07    | 3.02   | 3.12 | 2.47        | 2.39   | 2.55 | 3.21        | 3.14   | 3.28 | 3.61        | 3.56   | 3.67 |
| 2018                                                                                                                                                                                                                                      | 3.38 | 3.34   | 3.42 | 3.59  | 3.54   | 3.65 | 3.15    | 3.09   | 3.21 | 2.54        | 2.46   | 2.63 | 3.32        | 3.25   | 3.39 | 3.72        | 3.66   | 3.78 |

Abbreviations: CI (Confidence Interval). Diabetic macular edema or vision-threatening diabetic retinopathy (DME/VTDR) was defined as diabetic macular edema, severe non-proliferative diabetic retinopathy (with or without diabetic macular edema), or proliferative diabetic retinopathy (with or without diabetic macular edema).

| <b>Supplemental Table S11 (continued).</b> Annual prevalence of having ≥1 claim for diabetic macular edema or vision-threatening diabetic retinopathy (DME/VTDR) among adults 18–64 years of age with diabetes, IBM® MarketScan® Database (2009–2018) |                        |        |      |                        |        |      |                        |        |      |                          |        |      |                          |        |      |                          |        |      |
|-------------------------------------------------------------------------------------------------------------------------------------------------------------------------------------------------------------------------------------------------------|------------------------|--------|------|------------------------|--------|------|------------------------|--------|------|--------------------------|--------|------|--------------------------|--------|------|--------------------------|--------|------|
|                                                                                                                                                                                                                                                       | Males aged 18-44 years |        |      | Males aged 45-54 years |        |      | Males aged 55-64 years |        |      | Females aged 18-44 years |        |      | Females aged 45-54 years |        |      | Females aged 55-64 years |        |      |
| Year                                                                                                                                                                                                                                                  | %                      | 95% CI |      | %                      | 95% CI |      | %                      | 95% CI |      | %                        | 95% CI |      | %                        | 95% CI |      | %                        | 95% CI |      |
| 2009                                                                                                                                                                                                                                                  | 1.79                   | 1.71   | 1.88 | 1.99                   | 1.93   | 2.06 | 2.25                   | 2.19   | 2.30 | 1.42                     | 1.35   | 1.50 | 1.95                     | 1.88   | 2.01 | 2.38                     | 2.32   | 2.44 |
| 2010                                                                                                                                                                                                                                                  | 1.72                   | 1.63   | 1.80 | 1.98                   | 1.91   | 2.04 | 2.16                   | 2.10   | 2.22 | 1.40                     | 1.33   | 1.48 | 1.87                     | 1.81   | 1.94 | 2.21                     | 2.15   | 2.27 |
| 2011                                                                                                                                                                                                                                                  | 1.71                   | 1.63   | 1.78 | 1.86                   | 1.80   | 1.92 | 1.98                   | 1.94   | 2.03 | 1.30                     | 1.24   | 1.37 | 1.65                     | 1.60   | 1.71 | 2.04                     | 1.99   | 2.09 |
| 2012                                                                                                                                                                                                                                                  | 1.83                   | 1.75   | 1.90 | 2.18                   | 2.12   | 2.23 | 2.36                   | 2.32   | 2.41 | 1.43                     | 1.37   | 1.50 | 1.89                     | 1.83   | 1.94 | 2.38                     | 2.33   | 2.43 |
| 2013                                                                                                                                                                                                                                                  | 1.96                   | 1.87   | 2.05 | 2.26                   | 2.19   | 2.32 | 2.43                   | 2.37   | 2.49 | 1.49                     | 1.42   | 1.57 | 1.97                     | 1.91   | 2.04 | 2.42                     | 2.36   | 2.48 |
| 2014                                                                                                                                                                                                                                                  | 2.16                   | 2.08   | 2.25 | 2.55                   | 2.49   | 2.62 | 2.72                   | 2.67   | 2.78 | 1.68                     | 1.61   | 1.76 | 2.17                     | 2.10   | 2.24 | 2.71                     | 2.65   | 2.77 |
| 2015                                                                                                                                                                                                                                                  | 2.43                   | 2.32   | 2.54 | 2.98                   | 2.89   | 3.07 | 3.23                   | 3.16   | 3.30 | 1.86                     | 1.76   | 1.95 | 2.56                     | 2.48   | 2.65 | 3.09                     | 3.02   | 3.16 |
| 2016                                                                                                                                                                                                                                                  | 2.67                   | 2.55   | 2.79 | 3.48                   | 3.39   | 3.58 | 3.67                   | 3.59   | 3.74 | 2.09                     | 1.99   | 2.20 | 2.83                     | 2.75   | 2.93 | 3.52                     | 3.45   | 3.60 |
| 2017                                                                                                                                                                                                                                                  | 2.80                   | 2.68   | 2.93 | 3.52                   | 3.42   | 3.62 | 3.66                   | 3.58   | 3.74 | 2.15                     | 2.04   | 2.26 | 2.88                     | 2.79   | 2.98 | 3.56                     | 3.48   | 3.64 |
| 2018                                                                                                                                                                                                                                                  | 2.84                   | 2.71   | 2.97 | 3.64                   | 3.54   | 3.74 | 3.81                   | 3.73   | 3.90 | 2.26                     | 2.15   | 2.38 | 2.96                     | 2.87   | 3.06 | 3.62                     | 3.53   | 3.70 |

Abbreviations: CI (Confidence Interval). Diabetic macular edema or vision-threatening diabetic retinopathy (DME/VTDR) was defined as diabetic macular edema, severe non-proliferative diabetic retinopathy (with or without diabetic macular edema), or proliferative diabetic retinopathy (with or without diabetic macular edema).

| <b>Supplemental Table S12.</b> Annual prevalence of having $\geq 1$ claim for any diabetic macular edema (any DME) among adults 18–64 years of age with diabetes, IBM® MarketScan® Database (2009–2018) |      |        |      |       |        |      |         |        |      |             |        |      |             |        |      |             |        |      |
|---------------------------------------------------------------------------------------------------------------------------------------------------------------------------------------------------------|------|--------|------|-------|--------|------|---------|--------|------|-------------|--------|------|-------------|--------|------|-------------|--------|------|
| Year                                                                                                                                                                                                    | All  |        |      | Males |        |      | Females |        |      | 18-44 years |        |      | 45-54 years |        |      | 55-64 years |        |      |
|                                                                                                                                                                                                         | %    | 95% CI |      | %     | 95% CI |      | %       | 95% CI |      | %           | 95% CI |      | %           | 95% CI |      | %           | 95% CI |      |
| 2009                                                                                                                                                                                                    | 0.67 | 0.65   | 0.68 | 0.68  | 0.66   | 0.70 | 0.65    | 0.63   | 0.68 | 0.39        | 0.36   | 0.41 | 0.60        | 0.58   | 0.63 | 0.81        | 0.79   | 0.83 |
| 2010                                                                                                                                                                                                    | 0.74 | 0.72   | 0.76 | 0.77  | 0.74   | 0.79 | 0.71    | 0.69   | 0.73 | 0.45        | 0.42   | 0.49 | 0.69        | 0.66   | 0.71 | 0.87        | 0.85   | 0.90 |
| 2011                                                                                                                                                                                                    | 0.59 | 0.57   | 0.60 | 0.62  | 0.60   | 0.64 | 0.55    | 0.53   | 0.57 | 0.37        | 0.35   | 0.40 | 0.55        | 0.53   | 0.57 | 0.69        | 0.67   | 0.71 |
| 2012                                                                                                                                                                                                    | 1.00 | 0.99   | 1.02 | 1.08  | 1.05   | 1.10 | 0.93    | 0.90   | 0.95 | 0.61        | 0.58   | 0.64 | 0.91        | 0.89   | 0.94 | 1.20        | 1.18   | 1.23 |
| 2013                                                                                                                                                                                                    | 1.13 | 1.11   | 1.15 | 1.21  | 1.18   | 1.24 | 1.05    | 1.02   | 1.07 | 0.73        | 0.69   | 0.77 | 1.04        | 1.00   | 1.07 | 1.34        | 1.31   | 1.37 |
| 2014                                                                                                                                                                                                    | 1.41 | 1.39   | 1.43 | 1.51  | 1.48   | 1.54 | 1.30    | 1.27   | 1.33 | 0.93        | 0.89   | 0.97 | 1.29        | 1.26   | 1.33 | 1.66        | 1.63   | 1.69 |
| 2015                                                                                                                                                                                                    | 1.92 | 1.89   | 1.95 | 2.07  | 2.03   | 2.11 | 1.76    | 1.72   | 1.80 | 1.28        | 1.23   | 1.34 | 1.82        | 1.77   | 1.87 | 2.22        | 2.18   | 2.26 |
| 2016                                                                                                                                                                                                    | 2.44 | 2.40   | 2.47 | 2.62  | 2.58   | 2.67 | 2.23    | 2.19   | 2.28 | 1.66        | 1.60   | 1.73 | 2.32        | 2.26   | 2.38 | 2.79        | 2.74   | 2.84 |
| 2017                                                                                                                                                                                                    | 2.48 | 2.45   | 2.52 | 2.66  | 2.62   | 2.71 | 2.29    | 2.24   | 2.34 | 1.77        | 1.70   | 1.84 | 2.37        | 2.32   | 2.43 | 2.81        | 2.76   | 2.86 |
| 2018                                                                                                                                                                                                    | 2.60 | 2.57   | 2.64 | 2.80  | 2.75   | 2.85 | 2.39    | 2.34   | 2.44 | 1.85        | 1.78   | 1.92 | 2.50        | 2.44   | 2.56 | 2.94        | 2.89   | 2.99 |

Abbreviations: CI (Confidence Interval). Any diabetic macular edema (any DME) was characterized as any diagnosis of diabetic macular edema, by itself or with any stage of diabetic retinopathy.

| <b>Supplemental Table S12 (continued).</b> Annual prevalence of having $\geq 1$ claim for any diabetic macular edema (any DME) among adults 18–64 years of age with diabetes, IBM® MarketScan® Database (2009–2018) |                        |        |      |                        |        |      |                        |        |      |                          |        |      |                          |        |      |                          |        |      |
|---------------------------------------------------------------------------------------------------------------------------------------------------------------------------------------------------------------------|------------------------|--------|------|------------------------|--------|------|------------------------|--------|------|--------------------------|--------|------|--------------------------|--------|------|--------------------------|--------|------|
| Year                                                                                                                                                                                                                | Males aged 18-44 years |        |      | Males aged 45-54 years |        |      | Males aged 55-64 years |        |      | Females aged 18-44 years |        |      | Females aged 45-54 years |        |      | Females aged 55-64 years |        |      |
|                                                                                                                                                                                                                     | %                      | 95% CI |      | %                      | 95% CI |      | %                      | 95% CI |      | %                        | 95% CI |      | %                        | 95% CI |      | %                        | 95% CI |      |
| 2009                                                                                                                                                                                                                | 0.48                   | 0.44   | 0.52 | 0.62                   | 0.59   | 0.66 | 0.79                   | 0.75   | 0.82 | 0.30                     | 0.27   | 0.33 | 0.58                     | 0.55   | 0.62 | 0.84                     | 0.80   | 0.87 |
| 2010                                                                                                                                                                                                                | 0.55                   | 0.50   | 0.60 | 0.72                   | 0.68   | 0.76 | 0.87                   | 0.83   | 0.90 | 0.36                     | 0.32   | 0.40 | 0.65                     | 0.61   | 0.69 | 0.88                     | 0.85   | 0.92 |
| 2011                                                                                                                                                                                                                | 0.47                   | 0.43   | 0.51 | 0.61                   | 0.58   | 0.65 | 0.68                   | 0.65   | 0.71 | 0.28                     | 0.25   | 0.31 | 0.48                     | 0.45   | 0.52 | 0.70                     | 0.67   | 0.73 |
| 2012                                                                                                                                                                                                                | 0.74                   | 0.70   | 0.79 | 1.03                   | 0.99   | 1.07 | 1.22                   | 1.18   | 1.25 | 0.49                     | 0.45   | 0.53 | 0.79                     | 0.75   | 0.82 | 1.19                     | 1.15   | 1.23 |
| 2013                                                                                                                                                                                                                | 0.90                   | 0.84   | 0.96 | 1.15                   | 1.10   | 1.19 | 1.35                   | 1.31   | 1.39 | 0.56                     | 0.52   | 0.61 | 0.92                     | 0.88   | 0.97 | 1.32                     | 1.27   | 1.36 |
| 2014                                                                                                                                                                                                                | 1.15                   | 1.09   | 1.22 | 1.44                   | 1.39   | 1.49 | 1.68                   | 1.63   | 1.72 | 0.72                     | 0.67   | 0.77 | 1.14                     | 1.09   | 1.19 | 1.64                     | 1.59   | 1.69 |
| 2015                                                                                                                                                                                                                | 1.54                   | 1.45   | 1.63 | 2.02                   | 1.95   | 2.10 | 2.28                   | 2.22   | 2.34 | 1.04                     | 0.97   | 1.11 | 1.59                     | 1.53   | 1.66 | 2.15                     | 2.09   | 2.21 |
| 2016                                                                                                                                                                                                                | 1.96                   | 1.86   | 2.06 | 2.61                   | 2.53   | 2.69 | 2.85                   | 2.79   | 2.92 | 1.38                     | 1.30   | 1.46 | 2.01                     | 1.93   | 2.09 | 2.72                     | 2.65   | 2.79 |
| 2017                                                                                                                                                                                                                | 2.11                   | 2.00   | 2.22 | 2.66                   | 2.57   | 2.75 | 2.85                   | 2.78   | 2.92 | 1.45                     | 1.36   | 1.54 | 2.06                     | 1.99   | 2.15 | 2.77                     | 2.70   | 2.84 |
| 2018                                                                                                                                                                                                                | 2.14                   | 2.03   | 2.26 | 2.79                   | 2.70   | 2.88 | 3.03                   | 2.95   | 3.10 | 1.57                     | 1.48   | 1.67 | 2.18                     | 2.10   | 2.27 | 2.84                     | 2.77   | 2.92 |

Abbreviations: CI (Confidence Interval). Any diabetic macular edema (any DME) was characterized as any diagnosis of diabetic macular edema, by itself or with any stage of diabetic retinopathy.



**Supplemental Table S13.** Annual prevalence of having  $\geq 1$  claim for non-vision-threatening diabetes-related eye disease among adults 18–64 years of age with diabetes, IBM® MarketScan® Database (2009–2018)

| Year | All  |        |      | Males |        |      | Females |        |      | 18-44 years |        |      | 45-54 years |        |      | 55-64 years |        |       |
|------|------|--------|------|-------|--------|------|---------|--------|------|-------------|--------|------|-------------|--------|------|-------------|--------|-------|
|      | %    | 95% CI |      | %     | 95% CI |      | %       | 95% CI |      | %           | 95% CI |      | %           | 95% CI |      | %           | 95% CI |       |
| 2009 | 8.93 | 8.88   | 8.99 | 9.03  | 8.95   | 9.10 | 8.83    | 8.76   | 8.91 | 7.06        | 6.95   | 7.17 | 8.37        | 8.28   | 8.46 | 9.98        | 9.90   | 10.06 |
| 2010 | 8.56 | 8.50   | 8.61 | 8.72  | 8.65   | 8.80 | 8.38    | 8.30   | 8.46 | 6.76        | 6.65   | 6.88 | 8.06        | 7.97   | 8.16 | 9.53        | 9.45   | 9.61  |
| 2011 | 8.43 | 8.38   | 8.48 | 8.61  | 8.55   | 8.68 | 8.23    | 8.16   | 8.30 | 6.61        | 6.50   | 6.71 | 7.78        | 7.70   | 7.86 | 9.51        | 9.44   | 9.59  |
| 2012 | 8.33 | 8.29   | 8.38 | 8.55  | 8.49   | 8.61 | 8.10    | 8.04   | 8.17 | 6.50        | 6.40   | 6.59 | 7.68        | 7.61   | 7.76 | 9.42        | 9.36   | 9.49  |
| 2013 | 8.24 | 8.19   | 8.30 | 8.51  | 8.44   | 8.59 | 7.95    | 7.88   | 8.03 | 6.44        | 6.33   | 6.55 | 7.69        | 7.60   | 7.78 | 9.26        | 9.18   | 9.34  |
| 2014 | 8.53 | 8.48   | 8.58 | 8.80  | 8.73   | 8.87 | 8.24    | 8.17   | 8.31 | 6.61        | 6.51   | 6.72 | 7.98        | 7.89   | 8.06 | 9.59        | 9.51   | 9.66  |
| 2015 | 8.17 | 8.11   | 8.23 | 8.46  | 8.38   | 8.54 | 7.86    | 7.78   | 7.94 | 6.23        | 6.11   | 6.35 | 7.58        | 7.48   | 7.68 | 9.25        | 9.17   | 9.34  |
| 2016 | 6.01 | 5.96   | 6.06 | 6.35  | 6.28   | 6.42 | 5.64    | 5.58   | 5.71 | 4.75        | 4.64   | 4.86 | 5.69        | 5.61   | 5.78 | 6.67        | 6.60   | 6.74  |
| 2017 | 5.92 | 5.86   | 5.97 | 6.23  | 6.16   | 6.31 | 5.57    | 5.50   | 5.64 | 4.57        | 4.46   | 4.68 | 5.60        | 5.51   | 5.69 | 6.61        | 6.53   | 6.68  |
| 2018 | 5.96 | 5.91   | 6.01 | 6.33  | 6.26   | 6.40 | 5.56    | 5.49   | 5.64 | 4.66        | 4.55   | 4.78 | 5.67        | 5.58   | 5.76 | 6.62        | 6.54   | 6.70  |

Abbreviations: CI (Confidence Interval). Non-vision-threatening diabetes-related eye disease was characterized as background diabetic retinopathy, non-proliferative diabetic retinopathy (not otherwise specified), unspecified diabetic retinopathy without macular edema, mild non-proliferative diabetic retinopathy (without diabetic macular edema), moderate non-proliferative diabetic retinopathy (without diabetic macular edema), diabetes with ophthalmic manifestations, or other diabetic ophthalmic complication.

**Supplemental Table S13 (continued).** Annual prevalence of having  $\geq 1$  claim for non-vision-threatening diabetes-related eye disease among adults 18–64 years of age with diabetes, IBM® MarketScan® Database (2009–2018)

| Year | Males aged 18-44 years |        |      | Males aged 45-54 years |        |      | Males aged 55-64 years |        |      | Females aged 18-44 years |        |      | Females aged 45-54 years |        |      | Females aged 55-64 years |        |       |
|------|------------------------|--------|------|------------------------|--------|------|------------------------|--------|------|--------------------------|--------|------|--------------------------|--------|------|--------------------------|--------|-------|
|      | %                      | 95% CI |      | %                      | 95% CI |      | %                      | 95% CI |      | %                        | 95% CI |      | %                        | 95% CI |      | %                        | 95% CI |       |
| 2009 | 7.44                   | 7.28   | 7.61 | 8.57                   | 8.45   | 8.70 | 9.85                   | 9.74   | 9.96 | 6.70                     | 6.55   | 6.86 | 8.14                     | 8.02   | 8.27 | 10.13                    | 10.01  | 10.24 |
| 2010 | 7.26                   | 7.09   | 7.43 | 8.33                   | 8.20   | 8.46 | 9.47                   | 9.36   | 9.58 | 6.29                     | 6.13   | 6.45 | 7.78                     | 7.64   | 7.91 | 9.60                     | 9.48   | 9.72  |
| 2011 | 7.14                   | 6.99   | 7.29 | 8.05                   | 7.93   | 8.16 | 9.47                   | 9.37   | 9.58 | 6.10                     | 5.96   | 6.24 | 7.50                     | 7.38   | 7.61 | 9.55                     | 9.45   | 9.66  |
| 2012 | 6.94                   | 6.80   | 7.08 | 8.01                   | 7.90   | 8.11 | 9.44                   | 9.34   | 9.53 | 6.07                     | 5.94   | 6.20 | 7.33                     | 7.22   | 7.44 | 9.41                     | 9.31   | 9.51  |
| 2013 | 6.92                   | 6.76   | 7.08 | 8.05                   | 7.93   | 8.17 | 9.34                   | 9.24   | 9.45 | 5.97                     | 5.82   | 6.12 | 7.30                     | 7.17   | 7.42 | 9.17                     | 9.06   | 9.28  |
| 2014 | 7.12                   | 6.96   | 7.27 | 8.37                   | 8.25   | 8.49 | 9.64                   | 9.54   | 9.75 | 6.13                     | 5.99   | 6.28 | 7.55                     | 7.43   | 7.67 | 9.52                     | 9.41   | 9.63  |
| 2015 | 6.72                   | 6.54   | 6.90 | 7.95                   | 7.82   | 8.09 | 9.36                   | 9.25   | 9.48 | 5.76                     | 5.60   | 5.93 | 7.17                     | 7.04   | 7.31 | 9.13                     | 9.01   | 9.25  |
| 2016 | 5.20                   | 5.04   | 5.37 | 6.10                   | 5.98   | 6.23 | 6.89                   | 6.79   | 6.99 | 4.31                     | 4.17   | 4.46 | 5.25                     | 5.13   | 5.37 | 6.43                     | 6.33   | 6.53  |
| 2017 | 4.98                   | 4.81   | 5.15 | 5.98                   | 5.85   | 6.11 | 6.81                   | 6.71   | 6.92 | 4.18                     | 4.03   | 4.33 | 5.19                     | 5.06   | 5.31 | 6.37                     | 6.27   | 6.48  |
| 2018 | 5.13                   | 4.97   | 5.31 | 6.10                   | 5.97   | 6.23 | 6.87                   | 6.77   | 6.98 | 4.21                     | 4.06   | 4.37 | 5.20                     | 5.07   | 5.33 | 6.33                     | 6.22   | 6.44  |

Abbreviations: CI (Confidence Interval). Non-vision-threatening diabetes-related eye disease was characterized as background diabetic retinopathy, non-proliferative diabetic retinopathy (not otherwise specified), unspecified diabetic retinopathy without macular edema, mild non-proliferative diabetic retinopathy (without diabetic macular edema), moderate non-proliferative diabetic retinopathy (without diabetic macular edema), diabetes with ophthalmic manifestations, or other diabetic ophthalmic complication.

| <b>Supplemental Table S14. Annual prevalence of having ≥1 claim for treatment among adults 18–64 years with diabetes, IBM® MarketScan® Database (2009–2018)</b> |                      |        |       |                        |        |       |            |        |       |                           |        |      |                                     |        |       |
|-----------------------------------------------------------------------------------------------------------------------------------------------------------------|----------------------|--------|-------|------------------------|--------|-------|------------|--------|-------|---------------------------|--------|------|-------------------------------------|--------|-------|
| Year                                                                                                                                                            | Anti-VEGF injections |        |       | Laser photocoagulation |        |       | Vitrectomy |        |       | Retinal detachment repair |        |      | Anti-VEGF or laser photocoagulation |        |       |
|                                                                                                                                                                 | %                    | 95% CI |       | %                      | 95% CI |       | %          | 95% CI |       | %                         | 95% CI |      | %                                   | 95% CI |       |
| <b>Among patients with any diabetic macular edema</b>                                                                                                           |                      |        |       |                        |        |       |            |        |       |                           |        |      |                                     |        |       |
| 2009                                                                                                                                                            | 7.95                 | 7.16   | 8.81  | 51.32                  | 49.80  | 52.83 | 1.72       | 1.37   | 2.17  | 0.77                      | 0.54   | 1.08 | 54.67                               | 53.15  | 56.17 |
| 2010                                                                                                                                                            | 17.27                | 16.09  | 18.51 | 47.80                  | 46.15  | 49.46 | 1.28       | 0.97   | 1.68  | 0.61                      | 0.40   | 0.93 | 55.37                               | 53.72  | 57.01 |
| 2011                                                                                                                                                            | 18.50                | 17.16  | 19.91 | 33.48                  | 31.79  | 35.20 | 0.76       | 0.50   | 1.14  | 0.26                      | 0.13   | 0.51 | 44.04                               | 42.26  | 45.83 |
| 2012                                                                                                                                                            | 26.96                | 25.92  | 28.03 | 36.09                  | 34.92  | 37.27 | 1.09       | 0.88   | 1.35  | 0.79                      | 0.59   | 1.05 | 51.68                               | 50.46  | 52.90 |
| 2013                                                                                                                                                            | 30.05                | 28.88  | 31.24 | 30.97                  | 29.77  | 32.20 | 0.81       | 0.62   | 1.05  | 0.73                      | 0.54   | 1.00 | 50.25                               | 48.93  | 51.56 |
| 2014                                                                                                                                                            | 27.63                | 26.64  | 28.65 | 26.10                  | 25.11  | 27.12 | 0.52       | 0.39   | 0.69  | 0.47                      | 0.34   | 0.66 | 45.19                               | 44.05  | 46.33 |
| 2015                                                                                                                                                            | 36.12                | 35.27  | 36.98 | 27.69                  | 26.90  | 28.50 | 2.47       | 2.21   | 2.77  | 1.79                      | 1.56   | 2.06 | 49.88                               | 48.98  | 50.77 |
| 2016                                                                                                                                                            | 29.83                | 29.11  | 30.56 | 20.83                  | 20.19  | 21.49 | 1.27       | 1.10   | 1.47  | 0.91                      | 0.77   | 1.07 | 40.74                               | 39.96  | 41.53 |
| 2017                                                                                                                                                            | 32.01                | 31.25  | 32.78 | 18.57                  | 17.94  | 19.23 | 1.16       | 1.00   | 1.34  | 0.78                      | 0.64   | 0.94 | 41.38                               | 40.57  | 42.19 |
| 2018                                                                                                                                                            | 33.74                | 32.97  | 34.52 | 16.56                  | 15.96  | 17.18 | 1.11       | 0.95   | 1.29  | 0.68                      | 0.56   | 0.83 | 41.58                               | 40.77  | 42.39 |
| <b>Among patients with vision-threatening diabetic retinopathy with diabetic macular edema</b>                                                                  |                      |        |       |                        |        |       |            |        |       |                           |        |      |                                     |        |       |
| 2009                                                                                                                                                            | 18.66                | 17.37  | 20.02 | 68.31                  | 66.71  | 69.87 | 12.94      | 11.84  | 14.13 | 6.83                      | 6.02   | 7.74 | 72.71                               | 71.16  | 74.19 |
| 2010                                                                                                                                                            | 33.82                | 32.22  | 35.46 | 65.58                  | 63.94  | 67.18 | 13.78      | 12.62  | 15.02 | 6.89                      | 6.05   | 7.84 | 75.33                               | 73.83  | 76.78 |
| 2011                                                                                                                                                            | 36.62                | 35.11  | 38.16 | 53.21                  | 51.62  | 54.78 | 9.70       | 8.80   | 10.69 | 4.23                      | 3.63   | 4.94 | 66.93                               | 65.42  | 68.40 |
| 2012                                                                                                                                                            | 46.43                | 45.25  | 47.61 | 56.25                  | 55.07  | 57.41 | 10.87      | 10.16  | 11.63 | 6.45                      | 5.88   | 7.07 | 73.79                               | 72.74  | 74.81 |
| 2013                                                                                                                                                            | 49.93                | 48.66  | 51.20 | 51.61                  | 50.34  | 52.87 | 10.00      | 9.26   | 10.79 | 5.69                      | 5.11   | 6.32 | 72.52                               | 71.37  | 73.63 |
| 2014                                                                                                                                                            | 49.44                | 48.39  | 50.50 | 48.32                  | 47.26  | 49.37 | 8.74       | 8.16   | 9.36  | 5.15                      | 4.69   | 5.65 | 70.78                               | 69.81  | 71.73 |
| 2015                                                                                                                                                            | 51.49                | 50.43  | 52.55 | 43.63                  | 42.58  | 44.69 | 8.16       | 7.59   | 8.77  | 5.90                      | 5.41   | 6.44 | 70.31                               | 69.33  | 71.27 |
| 2016                                                                                                                                                            | 50.63                | 49.65  | 51.61 | 38.95                  | 38.00  | 39.91 | 7.95       | 7.42   | 8.50  | 6.16                      | 5.69   | 6.67 | 67.09                               | 66.16  | 68.00 |
| 2017                                                                                                                                                            | 55.11                | 54.11  | 56.11 | 35.26                  | 34.30  | 36.23 | 7.17       | 6.66   | 7.71  | 5.94                      | 5.47   | 6.45 | 68.73                               | 67.79  | 69.66 |
| 2018                                                                                                                                                            | 57.32                | 56.32  | 58.31 | 31.45                  | 30.52  | 32.39 | 7.04       | 6.54   | 7.58  | 5.00                      | 4.57   | 5.47 | 68.34                               | 67.40  | 69.27 |
| <b>Among patients with vision-threatening diabetic retinopathy without diabetic macular edema</b>                                                               |                      |        |       |                        |        |       |            |        |       |                           |        |      |                                     |        |       |
| 2009                                                                                                                                                            | 3.88                 | 3.59   | 4.20  | 33.03                  | 32.30  | 33.77 | 9.33       | 8.89   | 9.79  | 4.98                      | 4.65   | 5.33 | 34.36                               | 33.63  | 35.11 |
| 2010                                                                                                                                                            | 5.41                 | 5.02   | 5.82  | 31.68                  | 30.86  | 32.50 | 8.22       | 7.75   | 8.72  | 4.83                      | 4.46   | 5.23 | 33.58                               | 32.76  | 34.42 |
| 2011                                                                                                                                                            | 8.24                 | 7.81   | 8.68  | 28.76                  | 28.06  | 29.48 | 6.52       | 6.14   | 6.92  | 3.37                      | 3.10   | 3.67 | 32.20                               | 31.47  | 32.94 |
| 2012                                                                                                                                                            | 8.22                 | 7.81   | 8.66  | 25.08                  | 24.42  | 25.75 | 7.61       | 7.21   | 8.03  | 4.55                      | 4.24   | 4.88 | 28.71                               | 28.02  | 29.41 |
| 2013                                                                                                                                                            | 9.06                 | 8.56   | 9.60  | 25.58                  | 24.80  | 26.37 | 7.33       | 6.87   | 7.82  | 4.39                      | 4.03   | 4.78 | 29.50                               | 28.68  | 30.33 |
| 2014                                                                                                                                                            | 7.60                 | 7.16   | 8.08  | 21.98                  | 21.27  | 22.70 | 6.34       | 5.93   | 6.78  | 4.16                      | 3.82   | 4.52 | 25.58                               | 24.83  | 26.35 |
| 2015                                                                                                                                                            | 10.85                | 10.26  | 11.48 | 22.63                  | 21.82  | 23.45 | 6.52       | 6.05   | 7.02  | 4.27                      | 3.89   | 4.68 | 27.96                               | 27.10  | 28.85 |
| 2016                                                                                                                                                            | 5.55                 | 5.04   | 6.11  | 13.88                  | 13.10  | 14.71 | 3.59       | 3.18   | 4.05  | 2.51                      | 2.17   | 2.90 | 16.76                               | 15.91  | 17.64 |
| 2017                                                                                                                                                            | 8.19                 | 7.54   | 8.88  | 12.92                  | 12.12  | 13.77 | 4.17       | 3.71   | 4.69  | 2.85                      | 2.47   | 3.29 | 17.85                               | 16.93  | 18.80 |
| 2018                                                                                                                                                            | 11.27                | 10.49  | 12.10 | 12.71                  | 11.89  | 13.57 | 4.16       | 3.68   | 4.70  | 4.16                      | 3.68   | 4.70 | 19.60                               | 18.61  | 20.62 |

Abbreviations: CI (Confidence Interval), VEGF (Vascular Endothelial Growth Factor).

**Supplemental Table S15. Characteristics of MarketScan population (adults 18-64 years), by year**

| Characteristics          | Year       |            |            |            |            |            |            |            |            |            |
|--------------------------|------------|------------|------------|------------|------------|------------|------------|------------|------------|------------|
|                          | 2009       | 2010       | 2011       | 2012       | 2013       | 2014       | 2015       | 2016       | 2017       | 2018       |
| Total population         | 16,100,307 | 13,797,769 | 17,877,430 | 20,868,026 | 16,157,417 | 17,216,907 | 12,212,860 | 12,065,508 | 10,948,058 | 10,565,188 |
| Diabetes, %              | 7.0        | 7.2        | 7.0        | 6.9        | 6.8        | 7.1        | 7.4        | 7.5        | 7.5        | 7.4        |
| Population with diabetes | 1,123,930  | 991,864    | 1,245,064  | 1,447,640  | 1,103,917  | 1,214,799  | 906,067    | 901,129    | 822,157    | 779,212    |
| Sex, %                   |            |            |            |            |            |            |            |            |            |            |
| Male                     | 51.9       | 52.0       | 52.4       | 52.7       | 52.5       | 52.5       | 51.5       | 51.6       | 51.9       | 52.9       |
| Female                   | 48.1       | 48.0       | 47.6       | 47.3       | 47.5       | 47.5       | 48.5       | 48.4       | 48.1       | 47.1       |
| Age, %                   |            |            |            |            |            |            |            |            |            |            |
| 18–44 years              | 17.6       | 17.7       | 18.0       | 18.0       | 17.8       | 17.6       | 17.2       | 16.4       | 16.5       | 16.9       |
| 45–54 years              | 33.0       | 32.8       | 33.0       | 32.7       | 32.4       | 32.5       | 31.8       | 30.9       | 31.1       | 31.4       |
| 55–64 years              | 49.4       | 49.6       | 49.0       | 49.3       | 49.9       | 49.9       | 51.0       | 52.6       | 52.4       | 51.6       |
